# Supplementary material for: Natural chromite as a reference material for LA-ICP-MS analyses: development and calibration
Source: Royal Society of Chemistry journal article supplement (doi:10.1039/d5ja00299k), 2025-10-16
Supplement: d5ja00299k2.xlsx [file d5ja00299k2.xlsx]

## Sheet: LA-ICP-MS DATA
	Fe-internal calibration		MgO	1SD	Al2O3	1SD	Sc	1SD	Ti	1SD	V	1SD	Cr2O3	1SD	Mn	1SD	Co	1SD	Ni	1SD	Zn	1SD	Ga	1SD
			% m/m		% m/m		ug g-1		ug g-1		ug g-1		% m/m		ug g-1		ug g-1		ug g-1		ug g-1		ug g-1
	25Jun11A07	UG1-W-1	9.02824	0.123175	18.5108	0.258666	6.04277	2.51959	4922.09	1.81827	2849.66	1.49402	39.9985	0.552936	1964.37	1.4146	308.933	4.1645	955.635	1.12082	1075.76	1.38007	56.0773	0.897687
	25Jun11A08	UG1-W-2	9.04631	0.13115	18.5511	0.274497	6.12788	2.40214	5014.96	1.82825	2884.27	1.625	39.8811	0.566513	1961.61	1.43157	307.551	4.48383	973.059	1.28661	1016.49	1.46016	57.0272	1.07735
	25Jun11A09	UG1-W-3	9.23953	0.128009	18.7292	0.269421	6.44605	2.60043	4895.52	1.7946	2851.95	1.48595	39.3953	0.538061	1975.94	1.29214	312.614	4.11444	980.565	1.11482	1025.42	1.13203	57.2118	0.990815
	25Jun11A10	UG1-W-4	9.16115	0.142209	18.8281	0.286184	6.67172	2.65588	4853.84	1.81598	2850.94	1.66834	39.7316	0.601907	1945.05	1.45678	308.349	4.61914	959.351	1.31129	1087.66	1.5181	56.9841	1.0078
	25Jun11A11	UG1-W-5	9.1677	0.123949	19.1507	0.25379	6.36678	2.35113	4757.23	1.62334	2866.27	1.45445	39.6609	0.495677	1912.78	1.25978	310.724	4.00742	961.509	1.12786	1028.98	1.66754	57.8722	0.946423
	25Jun11A12	UG1-W-6	8.93546	0.127105	18.2313	0.260879	5.99628	2.22636	4825.2	1.79634	2804.69	1.52317	40.4191	0.568956	1975.24	1.4565	306.542	4.47714	931.509	1.19535	1113.06	1.70087	58.5685	1.25578
	25Jun11A13	UG1-W-7	9.32244	0.149022	18.9679	0.30508	6.02584	2.64077	5024.12	1.96799	2871.06	1.72172	39.7571	0.637949	1918.2	1.64581	313.045	5.06054	949.863	1.3767	1025.5	1.24696	57.1967	1.27382
	25Jun11A14	UG1-W-8	9.02395	0.146381	18.393	0.292356	6.54661	2.52862	4744.87	2.01336	2817.28	1.80808	40.1548	0.682006	1949.06	1.61819	310.869	5.3132	952.999	1.38022	1024.46	1.18437	57.4507	1.15346
	25Jun11A15	UG1-W-9	9.07038	0.125747	18.596	0.24853	6.45727	2.33625	4804.25	1.68177	2838.24	1.46255	40.0548	0.551541	1948.79	1.30543	311.501	4.06299	955.671	1.14128	1052.19	1.41121	57.5044	1.47456
	25Jun11A16	UG1-W-10	9.00956	0.146788	18.178	0.304478	6.09858	2.1533	4707.03	2.10646	2826.6	1.90105	40.677	0.814208	1933.51	1.73651	311.629	5.65096	928.888	1.60032	995.455	1.35545	59.7354	1.64715
	25Jun11A17	UG1-W-11	9.17101	0.169945	18.9269	0.349382	6.51261	2.2865	4894.37	2.46971	2862.19	2.05186	39.8918	0.885342	1931.3	2.05355	307.342	6.13102	967.459	1.64973	1015.18	1.26609	59.585	1.44713
	25Jun11A18	UG1-W-12	9.22801	0.179029	18.478	0.333662	6.38174	2.35411	4779.3	2.27667	2846.56	2.00828	40.1129	0.810385	1989.62	2.05093	311.366	5.56001	972.482	1.69225	1019.86	1.41259	57.642	1.2077
	25Jun11A19	UG1-W-13	9.11466	0.138525	18.8609	0.280669	6.38993	2.38386	4901.84	2.01958	2869.63	1.72748	39.715	0.65842	1935.56	1.5369	309.567	4.90164	978.804	1.24383	999.205	1.32287	60.5645	1.30464
	25Jun11A20	UG1-W-14	9.24824	0.164738	19.1341	0.349036	6.23938	2.36602	4893.58	2.30099	2904.66	2.03375	39.1587	0.726047	1936.59	1.81798	312.369	5.66365	984.857	1.5516	1074.95	1.58152	57.4082	1.01183
	25Jun11A21	UG1-W-15	8.95829	0.0902985	18.1506	0.171294	6.62699	2.1221	4824.19	1.15852	2843.74	1.09163	40.4628	0.409538	1988.27	1.11868	308.556	3.09134	961.308	1.05528	1017.11	1.58984	58.1808	0.847339
	25Jun11A22	UG1-W-16	9.078	0.0840946	18.6384	0.16861	6.52468	2.17387	4912.41	1.34178	2883	1.006	39.8997	0.334764	1941.73	0.81892	310.825	2.74321	975.308	0.680249	1016.6	1.53769	58.5181	0.946799
	25Jun11A23	UG1-W-17	9.10698	0.108087	18.6967	0.217536	6.43923	2.25631	4956.8	1.71763	2882.99	1.21239	39.8618	0.504098	1953.55	1.20603	309.401	3.81906	972.913	1.11925	987.57	1.13357	57.8221	0.936958
	25Jun11A24	UG1-W-18	9.09545	0.0977378	18.5203	0.189952	6.39629	2.14494	4823.36	1.36432	2853.93	1.19532	40.144	0.481028	1930.5	1.14829	308.897	3.49044	968.873	0.942949	1018.69	1.50008	58.3173	1.04759
	25Jun11A25	UG1-W-19	9.04724	0.104181	18.5577	0.209071	6.26641	2.32024	4822.59	1.47699	2852.41	1.36433	40.0139	0.517433	1945.5	1.20735	312.111	3.98426	956.461	1.07607	1035.76	2.08703	58.8187	1.45267
	25Jun11A26	UG1-W-20	9.10694	0.142593	18.557	0.279829	6.02825	2.25318	4874.94	2.12545	2871.83	1.74631	39.9092	0.717143	1948.06	1.66333	314.257	5.27351	982.134	1.57521	996.259	1.25654	57.0657	0.896999
	25Jun11A27	UG1-W-21	9.03682	0.0810835	18.6103	0.169426	6.40136	2.25671	4868.52	1.36038	2842.93	0.976121	40.0686	0.369781	1938	0.924449	309.149	2.84082	951.097	0.786643	1027	1.33796	58.6292	0.883407
	25Jun11A28	UG1-W-22	9.06355	0.080506	18.7832	0.173069	6.2182	2.0685	4855.6	1.18926	2855.55	1.03157	39.7533	0.397906	1937.34	0.936647	313.717	3.24221	976.477	0.806997	1028.6	1.40411	59.8325	1.0276
	25Jun11A29	UG1-W-23	9.1067	0.0942405	18.8363	0.191363	6.23934	2.16883	4900.9	1.47345	2863.63	1.17539	39.6199	0.447093	1968.82	1.13915	310.866	3.40565	987.259	0.963537	1037.66	1.78261	59.6917	0.958735
	25Jun11A30	UG1-W-24	9.23828	0.0725974	19.0741	0.150757	6.53442	2.01162	4890.79	1.24119	2880.21	0.950272	39.5255	0.341902	1904.06	0.806528	313.49	3.216	980.043	0.801367	1037.58	1.22268	58.1066	1.08018
	25Jun11A31	UG1-W-25	9.09851	0.0854177	18.6508	0.171894	6.00926	2.04155	4963.74	1.29554	2869.18	1.08911	39.736	0.366922	1949.85	0.916395	312.716	2.91933	989.951	0.942875	1042.72	1.99869	57.4088	0.916576
	25Jun11A32	UG1-W-26	8.95367	0.0891999	18.5652	0.189502	6.10017	2.15385	4889.25	1.35886	2855.61	1.11655	40.014	0.419173	1960.48	1.06683	312.484	3.5955	974.68	0.915448	1019.4	1.10494	59.3063	1.072
	25Jun11A33	UG1-W-27	9.09598	0.109095	18.7082	0.229948	6.54941	1.85281	4934.09	1.6349	2886.05	1.52086	39.9826	0.541198	1947.11	1.36382	316.985	4.66887	979.028	1.1938	1025.97	1.45572	58.9598	1.01845
	25Jun11A34	UG1-W-28	9.04635	0.103254	18.4004	0.210601	6.5501	1.75665	4934.1	1.56812	2867.61	1.34726	40.1198	0.505009	1943.75	1.16982	313.408	3.93255	987.7	1.12812	1051.34	1.24353	59.8714	0.931702
	25Jun11A35	UG1-W-29	9.07301	0.0772854	18.7125	0.162918	6.04344	1.87449	4922.39	1.18803	2867.5	0.904404	39.5784	0.351297	1959.81	0.812314	311.108	2.76323	996.962	0.790269	1005.36	1.50229	61.5283	1.27961
	25Jun11A36	UG1-W-30	9.42996	0.105636	18.7082	0.215657	6.43199	1.83827	4909.96	1.56956	2968.51	1.23648	38.1905	0.483165	1862.38	1.05273	314.348	3.85049	988.22	1.11097	1056.07	1.55086	56.6142	0.76022
	25Jun11A37	UG1-W-31	9.16389	0.0988731	19.2887	0.215179	5.85638	2.03379	4984.39	1.43734	2928.81	1.22295	39.3402	0.449681	1924.27	1.1978	315.831	3.31574	1020.74	1.06452	1036.08	1.28102	60.2898	0.954119
	25Jun11A38	UG1-W-32	9.10073	0.0962526	18.5788	0.193697	5.82712	2.26057	4895.46	1.27069	2856.38	1.04577	40.0793	0.417412	1945.07	0.9425	310.921	3.15842	969.177	0.863965	1012.3	1.55454	58.2346	1.2734
	25Jun11A39	UG1-W-33	9.20112	0.0905094	19.1066	0.194096	6.61108	1.92419	4888.36	1.23666	2901.15	1.04887	39.3538	0.410362	1925.53	1.00147	313.472	3.35055	1014.72	0.889849	1038.24	1.62351	57.3468	1.03081
	25Jun11A40	UG1-W-34	9.00878	0.131334	18.1683	0.238909	5.82949	2.19826	4900.79	1.92084	2824.47	1.49742	40.4805	0.717926	1946.76	1.4275	312.408	5.23761	994.904	1.63986	1010.52	17.065	59.5076	1.47538
	25Jun11A41	UG1-W-35	9.09655	0.112023	18.2602	0.200587	6.45213	1.91477	4821.57	1.56683	2858.01	1.26245	40.3998	0.516162	1947.44	1.18381	313.867	4.4106	972.358	1.07738	1030.62	2.031	58.5957	1.10408
	25Jun11A42	UG1-W-36	9.12081	0.138878	18.3112	0.264219	6.42154	2.29177	4833.07	2.02581	2870.21	1.70718	40.3358	0.672398	1961.58	1.60344	313.299	4.90084	986.091	1.48633	1028.22	1.8655	59.9624	1.19434
	25Jun11A43	UG1-W-37	9.01232	0.123248	18.4804	0.223892	6.62297	1.80431	4826.1	1.62709	2865.07	1.54644	40.2922	0.669345	1970.68	1.40353	313.912	4.84862	975.542	1.15274	980.133	1.352	57.2214	1.1221
	25Jun11A44	UG1-W-38	9.17172	0.101511	18.7745	0.20148	6.28339	1.96166	4954.03	1.49581	2864.74	1.20173	39.7199	0.466073	1944.3	1.11232	311.888	3.32143	982.06	0.922822	985.256	1.3468	58.9148	1.08419
	25Jun11A45	UG1-W-39	9.17707	0.0854497	19.4129	0.189553	6.29663	1.79535	4908.5	1.38755	2910.92	1.18299	39.2559	0.434041	1908.87	1.03871	313.565	3.65352	1021.73	0.902872	1054.15	1.56553	58.9657	0.930039
	25Jun11A46	UG1-W-40	9.27154	0.0850266	19.4725	0.165356	6.5157	2.02669	4957.27	1.28758	2912	0.9702	38.8591	0.391943	1891.46	0.845254	311.985	2.85313	1039.57	0.755244	1022.04	1.75029	58.5284	0.989949
	25Jun11A47	UG1-W-41	9.05444	0.08765	18.5685	0.169848	6.96893	2.14591	4940.77	1.27571	2819.58	1.04849	40.2286	0.431649	1924.39	0.931694	310.616	2.83778	967.578	0.771268	1066.16	1.44592	60.4895	0.893285
	25Jun11A48	UG1-W-42	9.01877	0.0920704	18.6329	0.192746	6.0633	2.25111	4858.73	1.59715	2842.99	1.12955	39.9134	0.403455	1945.25	1.01078	313.506	3.00238	993.054	0.823463	1038.95	1.15213	59.335	1.05132
	25Jun11A49	UG1-W-43	8.9757	0.0948705	18.5042	0.196129	6.21623	2.24653	4915.07	1.91002	2852.21	1.13766	40.0341	0.423651	1935.35	1.02912	307.889	3.25028	965.805	0.794872	1034.13	1.53968	60.2807	0.900962
	25Jun11A50	UG1-W-44	9.06302	0.0854261	18.6821	0.181262	5.85064	2.03587	4889.96	1.32112	2888.29	0.969218	39.9794	0.38468	1912.59	0.881564	312.142	2.97231	973.257	0.877806	1071.01	1.29719	58.2701	0.786037
	25Jun11A51	UG1-W-45	9.05078	0.085329	18.6616	0.16267	6.08119	1.88908	4824.04	1.34631	2866.24	1.04957	39.9754	0.419868	1937.56	1.07997	314.161	4.198	1002.96	0.892486	1077.84	2.27505	58.8223	1.05215
	25Jun11A52	UG1-W-46	9.13918	0.100585	18.9422	0.193976	6.18793	2.12482	4813.04	1.46379	2873.89	1.13647	39.5565	0.398273	1920.79	0.993901	311.412	3.24392	984.548	1.00055	1026.05	1.62837	60.1025	1.31054
	25Jun11A53	UG1-W-47	9.12115	0.0890913	19.1112	0.190671	5.97847	2.18053	4816.32	1.34127	2890.86	1.10042	39.3958	0.404604	1915.67	0.994287	312.975	3.09703	996.021	0.943639	1038.76	1.38133	59.1681	1.097
	25Jun11A54	UG1-W-48	9.11754	0.0904629	18.8976	0.183363	6.14526	2.07466	4988.04	1.2756	2867.58	1.07671	39.8324	0.417263	1907.97	0.978906	312.797	3.11507	971.825	0.865685	1040.62	1.31289	57.4157	0.968156
	25Jun11A55	UG1-W-49	9.03704	0.0895912	18.5913	0.188598	6.37472	2.20073	4849.23	1.33007	2862.05	1.14484	39.8769	0.417134	1952.8	1.09542	312.574	3.65515	978.876	1.03176	1035.99	1.36468	58.6724	0.948383
	25Jun11A56	UG1-W-50	9.20193	0.144667	19.2051	0.286934	5.75504	2.32307	4827.87	2.10475	2895.22	1.80246	39.5135	0.686402	1912.64	1.68167	314.056	5.46221	1002.44	1.53417	1017.49	1.55835	59.4733	0.888907
	25Jun11A57	UG1-W-51	9.09611	0.0798048	18.782	0.165526	6.41008	2.1381	4874.88	1.50258	2870.61	1.054	39.8048	0.387751	1925	0.891264	310.89	2.91925	965.987	0.822449	1040.87	1.00147	58.9187	0.881081
	25Jun11A58	UG1-W-52	8.96733	0.0975365	18.4323	0.197274	6.36325	2.29339	4783.05	1.5161	2825.72	1.16166	40.0444	0.425773	1988.6	1.17606	309.678	3.45511	958.533	0.930342	1032.62	1.21921	58.4099	1.13485
	25Jun11A59	UG1-W-53	9.02576	0.104363	18.6054	0.209989	6.39803	2.28572	4820.5	1.72215	2863.78	1.21286	39.869	0.467544	1954.53	1.15903	306.762	3.43919	962.435	0.950461	1047.17	1.51674	57.69	1.08716
	25Jun11A60	UG1-W-54	9.06596	0.0878138	18.8616	0.195376	6.28987	1.99186	4857.07	1.50859	2892.58	1.19356	39.6639	0.427051	1954.1	1.11034	312.85	3.53994	977.677	0.938752	1067.26	1.89212	60.7526	0.911833
	25Jun11A61	UG1-W-55	9.10141	0.0854232	18.9164	0.172215	6.4261	2.43249	4925.75	1.2662	2895.57	1.05137	39.4407	0.392291	1939.4	0.922409	312.257	3.25494	982.819	0.937522	1027.44	1.7638	60.1735	0.916101
	25Jun11A62	UG1-W-56	9.03137	0.107889	18.4128	0.199675	6.28945	2.11966	4858.45	1.69167	2834	1.29646	40.1414	0.544804	1945.57	1.25425	307.413	3.6713	965.347	1.18152	1034.01	1.64947	61.6136	1.0332
	25Jun11A63	UG1-W-57	8.98723	0.129806	18.3924	0.252077	6.25157	2.28063	4810.8	1.91625	2844.02	1.58571	39.9327	0.673409	1949.59	1.51943	310.33	4.73716	970.442	1.25308	1037.14	1.65957	57.1926	0.940393
	25Jun11A64	UG1-W-58	9.12469	0.090326	18.8789	0.180552	6.0826	2.06251	4845.35	1.22834	2904.9	1.06595	39.5162	0.385156	1963.48	0.99615	314.859	2.80544	1001.46	0.869335	1052.62	1.57561	58.7392	1.16483
	25Jun11A65	UG1-W-59	9.1779	0.096901	19.1914	0.205549	6.01333	2.02641	4863.91	1.43892	2892.18	1.19843	39.0031	0.479703	1928.65	1.12366	309.955	3.65549	997.629	1.02691	1065.61	1.14361	58.6771	1.09465
	25Jun11A66	UG1-W-60	9.10708	0.0864155	19.127	0.184624	6.53271	2.27871	4943.02	1.49903	2902.99	1.0634	39.2595	0.377309	1930.1	0.90218	312.537	2.96798	986.148	0.847679	1031.83	1.32738	60.6873	1.13553
	25Jun11A67	UG1-W-61	8.92992	0.0849964	18.478	0.168862	6.31044	2.07947	4854.43	1.3156	2862.5	1.02323	39.9927	0.37096	1947.3	0.899579	312.347	2.98833	972.529	0.830072	1027.02	1.16782	59.0769	1.04412
	25Jun11A68	UG1-W-62	9.11544	0.122951	19.0763	0.2574	6.25681	2.37575	4979.8	1.90673	2903.34	1.49136	39.2758	0.529563	1930.64	1.25059	313.742	4.40195	995.586	1.1808	1048.68	1.66696	58.4684	0.967462
	25Jun11A69	UG1-W-63	9.13809	0.111379	18.8414	0.218353	6.29341	1.98154	4851.4	1.55561	2878.25	1.37154	39.7516	0.547603	1926.31	1.19949	309.985	3.57581	974.591	0.997182	1028.94	1.05851	57.0055	1.05763
	25Jun11A70	UG1-W-64	9.15163	0.0883293	19.257	0.19211	6.08089	2.17772	4940.55	1.36772	2905.64	1.0663	39.1989	0.44206	1916.96	1.00377	314.007	3.1959	1009.57	0.88594	1032.21	1.07879	61.0567	1.21396
	25Jun11A71	UG1-W-65	9.10403	0.113511	18.9664	0.207296	6.603	2.13804	4917.51	1.53703	2862.42	1.23811	39.5405	0.452819	1938.37	1.20911	311.903	3.71392	971.827	1.04302	1080.34	2.19787	59.1586	0.954971
	25Jun11A72	UG1-W-66	9.09998	0.103522	18.8225	0.211093	6.58104	2.0944	4828.29	1.58011	2893.01	1.26899	39.6997	0.535129	1918.76	1.10726	312.891	3.73866	980.075	0.998432	1048.09	1.96078	58.4038	1.06424
	25Jun11A73	UG1-W-67	9.04692	0.124673	18.4996	0.240755	6.72364	2.20404	4877.62	1.78903	2871.9	1.53681	40.0516	0.585336	1954.11	1.36896	312.569	4.25258	963.731	1.18752	1040.39	1.57959	60.491	1.08475
	25Jun11A74	UG1-W-68	9.20283	0.113732	19.4845	0.246895	6.69193	2.0692	4992.29	1.8889	2931.48	1.43065	38.9818	0.552582	1909.84	1.27552	314.346	4.13319	1018.84	1.12482	1060.05	2.51506	58.2028	0.977589
	25Jun11A75	UG1-W-69	9.08533	0.111941	18.7464	0.226727	6.8834	2.38635	4911.07	1.7039	2885.81	1.42096	39.6417	0.49681	1928.75	1.17402	314.328	4.75544	988.441	1.13195	1081.93	1.57362	58.2642	0.91357
	25Jun11A76	UG1-W-70	9.06596	0.125563	18.7997	0.251876	6.9053	2.10258	4938.55	1.72857	2892.52	1.48864	39.6473	0.544498	1936.28	1.33739	310.89	4.23524	974.017	1.24775	1053.65	1.24557	58.4041	0.83634
	25Jun11A77	UG1-W-71	9.08913	0.0848194	19.2452	0.164054	6.89895	2.12783	4803.04	1.302	2877.63	1.01999	39.325	0.364904	1922.47	0.865418	313.022	2.97256	1009.94	0.856887	1040.27	1.92657	59.9755	1.00967
	25Jun11A78	UG1-W-72	9.04016	0.0785771	19.0907	0.165664	6.84489	1.93818	4879.3	1.1774	2857.29	0.997096	39.6102	0.361256	1924.14	0.840113	310.321	2.93045	990.17	0.79498	1036.31	1.41784	56.2376	1.00058
	25Jun11A79	UG1-W-73	9.12283	0.0935247	19.0307	0.183373	6.87501	1.97053	4753.64	1.3245	2853.68	1.05494	39.6231	0.450497	1917.77	0.973379	310.349	3.27328	992.975	0.935025	1040.16	1.49738	58.5367	1.06499
	25Jun11A80	UG1-W-74	9.15722	0.0708136	19.1661	0.140904	6.52296	1.97179	4931.46	1.05032	2860.54	0.918329	39.4843	0.332355	1906.62	0.713473	313.935	2.41504	994.806	0.69419	1066.94	1.16017	60.4632	0.943914
	25Jun11A81	UG1-W-75	9.16943	0.0908887	19.1157	0.191271	6.68639	2.08541	5032.5	1.37731	2862.57	1.08835	39.4576	0.438986	1924.4	1.02936	308.496	2.88402	993.451	0.993796	1026.8	1.57063	59.5027	0.91428
	25Jun11A82	UG1-W-76	9.01552	0.106081	18.4121	0.21663	6.96381	2.16692	4924.1	1.63727	2795.48	1.32169	40.0432	0.536551	1976.79	1.34082	310.165	4.10263	961.138	1.09586	1045.29	1.36967	58.2622	0.838483
	25Jun11A83	UG1-W-77	9.11752	0.0825503	19.2003	0.177674	7.0881	2.10049	4769.87	1.39573	2847.47	1.04037	39.282	0.360615	1930.08	0.918733	311.328	2.91034	994.51	0.810226	1089.86	1.35482	61.0507	1.02059
	25Jun11A84	UG1-W-78	9.27022	0.0818174	19.4906	0.180626	6.77944	2.35803	4814.91	1.50578	2881.83	0.996883	38.8389	0.348192	1929.15	0.872377	312.947	2.83454	1010.01	0.80848	1016.23	1.19354	57.9946	0.900645
	25Jun11A85	UG1-W-79	9.19667	0.0922424	19.245	0.199017	6.43372	2.04654	4976.95	1.37216	2845.4	1.1134	39.019	0.390146	1950.67	1.01389	314.046	3.24909	1007.78	0.914199	1055.49	1.94316	60.2929	0.997703
	25Jun11A86	UG1-W-80	9.15685	0.0875993	19.2455	0.195986	7.02792	1.92878	5026.11	1.76749	2858.67	1.17921	39.2456	0.422719	1934.19	1.0942	311.221	3.30483	986.174	0.869776	1038.61	1.62546	59.864	1.08779
	25Jun11A87	UG1-W-81	9.3341	0.0996896	19.4553	0.184597	6.40848	2.03716	4978.73	1.25763	2888.36	1.08496	38.669	0.406265	1928.16	1.09476	313.12	3.17541	1022.2	0.968458	1027.76	1.9573	59.8725	1.05578
	25Jun11A88	UG1-W-82	9.16152	0.10061	18.8592	0.199446	6.79222	2.00504	4834.67	1.45227	2831.67	1.22053	39.4998	0.487405	1965.21	1.39052	314.107	3.76418	986.674	1.09087	1025.33	1.09856	58.9981	0.927008
	25Jun11A89	UG1-W-83	9.24339	0.101337	19.3799	0.230948	6.79936	2.17758	4834.52	1.51258	2847.54	1.21405	39.0256	0.483668	1941.33	1.16386	314.76	3.70801	998.501	0.963237	1057.12	1.44065	58.0407	1.02704
	25Jun11A90	UG1-W-84	9.2595	0.111039	19.2649	0.218619	6.75796	2.39995	4888.18	1.54696	2906.99	1.32648	38.7506	0.463982	1991.2	1.22965	314.245	3.85805	994.142	1.11079	1041.16	1.38787	60.0457	1.05047
	25Jun11A91	UG1-W-85	9.26011	0.0790405	19.3729	0.160626	6.83932	2.31266	4940.31	1.08133	2863.98	0.965643	38.7949	0.3489	1932.16	0.829874	312.048	2.63308	1014.36	0.785239	1024.49	1.63286	62.2873	1.19379
	25Jun11A92	UG1-W-86	9.23355	0.0825458	19.2117	0.163993	6.86022	2.2071	4963.55	1.23096	2862.43	0.979762	38.8161	0.342507	1940.18	0.850795	314.369	2.62883	1020.75	0.842105	1067.14	1.83663	61.1514	1.01679
	25Jun11A93	UG1-W-87	9.10939	0.0801884	18.6662	0.171805	6.91183	2.07313	4960.07	1.24179	2858.27	1.00612	39.2765	0.353265	1957.22	0.877376	314.619	2.83939	1003.43	0.907966	996.102	1.43085	59.8851	1.28736
	25Jun11A94	UG1-W-88	9.25812	0.0953615	19.1526	0.196652	6.61981	2.1167	4972.56	1.42389	2878.97	1.21287	38.8708	0.418286	1954.99	1.03901	316.028	3.40398	1014.93	0.99572	1070.14	1.48946	57.9947	1.07123
	25Jun11A95	UG1-W-89	9.3287	0.0916676	19.4826	0.196717	6.75329	2.30759	4974.96	1.377	2894.12	1.20391	38.4931	0.466004	1934.33	1.05192	314.746	3.3356	1029.94	0.95846	1055.75	1.41353	59.3091	1.11521
	25Jun11A96	UG1-W-90	9.27909	0.0720925	19.3552	0.152944	6.79475	1.77607	4831.82	1.07623	2865.31	0.904082	38.6469	0.335459	1947.45	0.806833	318.046	2.66233	1016.58	0.712019	1056.85	1.31436	59.0295	1.278
	25Jun11A97	UG1-W-91	9.21454	0.105013	19.1238	0.207555	6.57861	2.0102	4747.93	1.51924	2865.64	1.29007	39.3125	0.53862	1935.99	1.19409	314.051	4.04958	1009.85	1.21625	1060.08	1.73463	59.6824	1.11321
	25Jun11A98	UG1-W-92	9.04994	0.102014	18.5334	0.219794	6.44699	2.21461	4841.79	1.44828	2839.01	1.31517	39.7471	0.505561	1971.87	1.19307	315.374	3.97145	995.139	1.20267	1086.29	1.46087	61.7203	1.33368
	25Jun11A99	UG1-W-93	9.16383	0.102376	19.0975	0.215198	6.94931	2.00934	4879.4	1.43621	2859.67	1.28645	39.186	0.524825	1945.98	1.11535	311.232	3.30252	1008.56	1.10679	1043.64	1.2408	61.5342	1.78012
	25Jun11A100	UG1-W-94	9.15895	0.139798	18.7375	0.261679	6.0455	2.3584	4834.09	1.85977	2848.63	1.63001	39.5421	0.68419	1940.03	1.56999	315.589	5.24193	1012.96	1.34653	1046.56	1.23304	56.6511	0.892528
	25Jun11A101	UG1-W-95	9.1253	0.0938254	18.9837	0.188425	6.88784	1.94907	4968.88	1.54745	2883.24	1.20911	39.3928	0.494575	1953.16	1.11553	316.994	4.47744	1014.56	1.14043	1082.08	2.09118	59.0206	1.18141
	25Jun11A102	UG1-W-96	9.2595	0.0947693	19.4034	0.197514	6.39368	2.10806	4773.8	1.35352	2869.31	1.1354	39.289	0.514354	1922.68	1.071	314.536	3.13509	1031.73	1.0488	1063.2	1.81217	59.313	0.919577
	25Jun11A103	UG1-W-97	9.15359	0.137097	18.7102	0.258151	6.32343	1.91021	4843.39	1.82255	2868.18	1.60517	39.6772	0.661018	1948.36	1.55194	317.936	5.2359	1024.59	1.58221	1071.34	1.86263	58.1245	1.08453
	25Jun11A104	UG1-W-98	8.99893	0.101263	18.2959	0.18219	6.54359	1.97273	4726.48	1.29337	2782.5	1.09032	40.527	0.512261	1945.53	1.15251	313.513	3.67987	977.141	1.07052	1062.54	1.84343	57.2669	0.815542
	25Jun11A105	UG1-W-99	9.13241	0.0990932	18.8797	0.201661	6.18286	2.02071	4732.88	1.39994	2835.24	1.14439	39.8856	0.503882	1901.28	1.0922	315.986	4.58152	999.024	1.17999	1066.87	1.87304	59.5224	1.14137
	25Jun11A106	UG1-W-100	9.30833	0.101327	19.3312	0.204515	6.28499	2.07112	4789.91	1.46207	2869.51	1.18028	39.311	0.44056	1878.56	1.03596	314.985	3.97145	1015.46	1.03721	1092.75	1.72279	60.9529	1.07007
	25Jun11A107	UG1-W-101	9.02838	0.0776702	18.9089	0.157403	6.5856	2.20701	4838.1	1.27767	2870.64	0.962511	39.7617	0.350128	1930.64	0.834869	313.051	2.8737	982.58	0.800008	1052.64	1.5136	61.6179	0.760131
	25Jun11A108	UG1-W-102	8.99124	0.0714092	18.846	0.155046	6.49254	1.96896	4851.56	1.08418	2865.45	0.909462	39.8642	0.347081	1901.51	0.792163	310.794	2.83781	964.925	0.814351	1061.64	1.69734	58.0269	1.01745
	25Jun11A109	UG1-W-103	8.96283	0.0823605	18.8123	0.166414	6.31122	2.20872	4845.41	1.26607	2856.89	1.00959	39.9754	0.371548	1916.51	0.842448	311.811	2.79003	980.704	0.755633	1041.9	1.63982	58.5287	0.882021
	25Jun11A110	UG1-W-104	9.11829	0.076915	19.406	0.159027	6.4923	2.04566	4955.87	1.2315	2899.38	0.869266	39.3212	0.344008	1907.1	0.755373	311.118	2.54459	1016.48	0.768706	1036.09	1.19493	60.093	1.07332
	25Jun11A111	UG1-W-105	9.08721	0.0667774	19.4894	0.13463	6.48896	2.01458	4923.77	1.24552	2916.47	0.806392	39.2511	0.335743	1896.05	0.716633	312.453	3.21048	1014.98	0.693518	1095.19	3.38649	57.9904	0.831676
	25Jun11A112	UG1-W-106	8.95998	0.070146	18.8899	0.149035	6.49543	2.15937	4927.92	1.38416	2874.21	0.842051	40.0651	0.306079	1899.11	0.706353	311.956	2.46998	957.463	0.679429	1020.97	1.21477	58.6262	0.97671
	25Jun11A113	UG1-W-107	9.02658	0.0739906	19.092	0.160762	6.77977	1.88797	4809.31	1.27296	2883.13	0.90759	39.7425	0.318816	1908.83	0.770959	305.98	2.50487	991.115	0.680564	1048.85	1.27534	58.2306	0.986353
	25Jun11A114	UG1-W-108	9.05029	0.0823971	19.2104	0.16732	6.71959	2.06162	4885.28	1.20358	2899.1	0.954972	39.384	0.353583	1911.69	0.784896	311.832	3.12168	1009.48	0.773272	1041.52	1.23262	57.0008	0.741907
	25Jun11A115	UG1-W-109	9.05331	0.078759	18.8613	0.160354	6.49761	1.8849	4925.73	1.32474	2875.86	0.992701	39.7636	0.370777	1931.13	0.87804	312.422	2.64934	971.896	0.811345	1045.35	1.39883	59.7999	1.04605
	25Jun11A116	UG1-W-110	8.95575	0.0846832	18.884	0.178655	6.44465	1.95245	4931.9	1.55336	2874.52	1.02166	39.7693	0.383344	1931.52	1.00612	310.602	3.09734	979.858	0.907906	1046.12	1.42513	58.9355	1.31001
	25Jun11A117	UG1-W-111	8.97233	0.078293	18.7486	0.166744	6.39585	2.07167	4874.42	1.25148	2872.66	0.994975	39.859	0.381001	1930.2	0.880328	310.506	2.56923	999.875	1.4802	1027.88	1.37147	56.8674	1.02778
	25Jun11A118	UG1-W-112	8.92538	0.0756841	18.819	0.15196	6.71557	2.04052	4787.45	1.08409	2862.15	0.910231	39.9353	0.393413	1929.04	0.852485	311.064	2.73095	966.03	0.686321	1013.72	1.10067	58.4648	0.944588
	25Jun11A119	UG1-W-113	9.11224	0.100163	19.0521	0.200542	6.33841	2.00727	4874.23	1.43326	2912.17	1.17802	39.4137	0.476919	1910.59	1.12781	310.29	3.35592	996.544	0.957761	1053.84	1.27624	58.7325	0.7433
	25Jun11A120	UG1-W-114	9.02024	0.125141	18.5622	0.235673	6.2556	2.19396	4870.7	1.83082	2882.52	1.53807	39.9274	0.619971	1935.56	1.35554	310.92	4.40641	984.971	1.25749	1013.38	1.07702	60.2353	1.01802
	25Jun11A121	UG1-W-115	9.06535	0.121521	18.5369	0.227923	6.08721	2.06725	4856	1.65787	2874.82	1.36673	40.0782	0.558756	1957.46	1.29075	307.859	3.79442	981.336	1.16407	1040.16	1.52813	58.1285	1.00867
	25Jun11A122	UG1-W-116	9.10925	0.109451	18.9179	0.198203	6.25426	2.11937	4805.95	1.47751	2848.96	1.35169	39.4873	0.49139	1940.33	1.24702	315.838	4.35283	996.127	1.10617	1023.29	1.19907	58.2763	0.962902
	25Jun11A123	UG1-W-117	9.2113	0.0914161	19.2447	0.187473	6.46128	2.09983	4887.38	1.32816	2842.63	1.04702	39.1553	0.426511	1918.29	0.966741	312.888	3.48205	1003.33	0.933574	1026.34	1.28273	56.2037	0.838418
	25Jun11A124	UG1-W-118	9.06258	0.107981	18.9213	0.218221	6.43612	2.30305	4868.19	1.58168	2810.02	1.3063	39.648	0.674423	1939.5	1.20288	313.381	3.8265	1008.41	1.01449	1064.94	1.42233	58.3136	0.847386
	25Jun11A125	UG1-W-119	9.01983	0.0926884	18.4035	0.180437	6.39372	1.87378	4824.53	1.45989	2817.71	1.16759	39.8947	0.418704	1960.99	1.01356	314.713	3.75645	977.912	1.03413	1037.1	1.19426	58.1144	0.837149
	25Jun11A126	UG1-W-120	9.0685	0.0982085	18.8339	0.207626	6.49478	2.12307	4895.42	1.44849	2807.26	1.15457	39.7212	0.471774	1962.64	1.28063	312.809	3.67726	974.148	1.02285	1038.68	1.25458	57.7028	1.04561
	25Jun11A127	UG1-W-121	9.02977	0.0777855	18.449	0.16308	6.7481	2.33181	4813.36	1.22804	2840.38	0.979238	40.3426	0.365493	1923.07	0.897106	309.223	2.92969	948.357	0.779271	1066.53	1.23403	58.1239	0.975262
	25Jun11A128	UG1-W-122	9.15729	0.0876718	19.0762	0.196583	6.85067	2.32751	4912.91	1.60328	2891.69	1.10768	39.5472	0.380619	1933.8	0.962695	311.239	3.13314	978.15	0.913754	1026.99	1.17997	58.5827	1.12268
	25Jun11A129	UG1-W-123	9.12997	0.0942586	18.8256	0.196461	6.73923	2.25956	4896.13	1.56878	2869.23	1.12351	39.856	0.421378	1927.64	1.02349	311.248	3.29614	965.906	0.806093	1014.23	1.27346	57.9149	1.11544
	25Jun11A130	UG1-W-124	9.16208	0.139663	18.9805	0.292661	6.67875	2.24025	4895.63	2.06671	2877.29	1.80995	39.7038	0.6226	1902.85	1.52558	309.762	4.77638	978.748	1.37838	1046.64	1.57729	57.9683	0.81249
	25Jun11A131	UG1-W-125	9.15426	0.105489	19.0092	0.211559	6.69687	2.3352	4929.97	1.46073	2879.23	1.23206	39.6886	0.477504	1902.04	1.09062	309.45	3.38613	967.984	0.917004	1025.46	1.40173	57.072	1.08639
	25Jun11A132	UG1-W-126	9.06511	0.120796	18.3916	0.234407	6.68455	1.87834	4875.99	1.65896	2868.41	1.3902	40.3576	0.602954	1923.98	1.24632	313.003	3.88624	959.347	1.21417	1072.47	1.01135	58.7681	0.818879
	25Jun11A133	UG1-W-127	9.07072	0.0998317	18.7162	0.200906	6.69028	2.21993	4838.19	1.50122	2843.91	1.16824	40.0726	0.485205	1924.25	1.03839	312.405	3.23828	964.772	0.831372	1042.78	1.76003	57.7082	0.846629
	25Jun11A134	UG1-W-128	9.12134	0.0781822	18.7729	0.159531	6.67279	2.13675	4840.83	1.34899	2852.78	0.988801	39.9863	0.374151	1919.37	0.913623	311.287	2.81659	971.662	0.837746	1066.06	1.32023	58.503	0.929607
	25Jun11A135	UG1-W-129	8.93695	0.0871049	18.1438	0.170473	6.66255	1.97288	4814.42	1.2473	2821.6	1.02114	40.8965	0.44715	1923.19	0.986635	312.577	3.43031	924.071	0.832474	1066	1.84091	59.1267	1.02813
	25Jun11A136	UG1-W-130	9.0285	0.0919984	18.4506	0.192609	6.67077	2.22365	4949.48	1.43297	2863.75	1.19414	40.0666	0.426098	1935.13	1.00772	311.21	3.42891	965.135	0.907048	1065.32	1.22842	58.9123	0.962264
	25Jun11A137	UG1-W-131	9.0915	0.0990368	18.8239	0.202325	6.66425	2.13419	4909.54	1.43847	2878.14	1.17642	39.7607	0.410176	1922.27	1.08745	312.493	3.18703	976.408	0.900767	1064.03	1.28845	57.5441	1.09716
	25Jun11A138	UG1-W-132	8.98715	0.0993389	18.6396	0.195265	6.6623	2.23411	5029.65	1.49125	2872.23	1.29693	40.0863	0.46428	1935.4	1.08559	309.433	3.64494	961.896	0.941197	1027.4	1.20524	57.9436	0.92807
	25Jun11A139	UG1-W-133	9.10405	0.0925949	19.1137	0.20812	6.77016	2.14399	5070.05	1.8142	2889.03	1.18209	39.5178	0.412332	1912.5	1.03832	308.979	3.09773	974.083	0.928296	1032.28	1.57654	57.3869	0.948316
	25Jun11A140	UG1-W-134	9.08337	0.120923	19.1747	0.26134	6.72985	2.43377	4998.42	1.78704	2903.33	1.50652	39.4453	0.544037	1903.66	1.28656	309.29	4.43144	987.338	1.13012	1061.48	1.2229	56.3664	0.910814
	25Jun11A141	UG1-W-135	9.11305	0.110011	19.0299	0.241281	6.74153	2.27752	4955.2	1.71979	2898.11	1.44877	39.764	0.523801	1910.5	1.21747	309.907	3.90097	981.98	1.16872	1069.6	1.66023	58.9776	1.13093
	25Jun11A142	UG1-W-136	9.0657	0.124531	18.6789	0.265708	6.78383	2.91245	4893.66	1.837	2873.07	1.59129	40.1553	0.559947	1924.03	1.40368	312.546	4.54596	976.087	1.20461	1034.97	1.42295	60.916	1.02675
	25Jun11A143	UG1-W-137	9.03	0.101424	18.7796	0.211047	6.67379	2.24183	4952.1	1.62817	2854.01	1.3106	39.9705	0.490525	1921.21	1.17648	307.971	3.61058	967.474	1.02347	1057.83	1.11587	60.2936	1.00847
	25Jun11A144	UG1-W-138	9.06971	0.0985812	18.9368	0.216609	6.78864	2.17448	4925.62	1.63479	2862.07	1.24121	39.6986	0.446635	1904.04	1.14611	310.486	3.66915	967.979	0.966653	1047.27	2.9975	61.2286	1.01821
	25Jun11A145	UG1-W-139	9.06677	0.102431	18.8512	0.19969	6.68942	2.53731	4895.25	1.47012	2864.31	1.23268	40.0526	0.524364	1907.5	1.09141	308.919	3.64648	959.492	1.02643	1116.5	1.62506	59.4877	0.926185
	25Jun11A146	UG1-W-140	9.24814	0.122554	19.0535	0.240767	6.70353	2.11974	4900.69	1.78522	2890.1	1.48882	39.609	0.504292	1883.09	1.28493	314.815	4.23309	980.205	1.17219	1125.56	1.68369	60.1169	1.48967
	25Jun11A147	UG1-W-141	9.1872	0.0796939	19.1746	0.178673	6.43797	1.78306	4945.82	1.28567	2882.88	1.00141	38.7486	0.345352	1896.22	0.855969	313.898	3.0447	1029.03	0.853016	1062.72	1.30204	58.6941	0.967722
	25Jun11A148	UG1-W-142	9.18985	0.0816466	19.6509	0.168217	6.30915	2.24295	4962.13	1.23339	2884.21	0.971662	39.043	0.349623	1880.48	0.838838	310.092	2.75487	1008.02	0.784903	1026.11	1.30126	58.1211	0.924862
	25Jun11A149	UG1-W-143	9.27145	0.0916206	19.6141	0.200223	6.38198	2.16882	4954.1	1.2877	2911.84	1.12621	38.6553	0.386945	1887.13	0.998851	313.569	3.20022	1029.21	0.940784	1110.86	1.06775	60.3446	1.09545
	25Jun11A150	UG1-W-144	9.13532	0.0968398	19.4791	0.19787	6.38709	1.93491	5041.79	1.92423	2851.47	1.10042	39.3491	0.427622	1895.34	0.982218	311.875	3.41488	995.122	0.877841	1069.32	1.61391	58.0585	0.988779
	25Jun11A151	UG1-W-145	9.2177	0.0918722	19.2459	0.200185	6.21115	1.82036	4914.83	1.22501	2898.83	1.09929	38.7591	0.366315	1874.82	0.956534	314.406	3.28445	1033.55	0.963372	1031.9	1.27639	57.1189	0.857234
	25Jun11A152	UG1-W-146	9.02086	0.14246	18.8245	0.281726	6.09915	1.72518	4871.88	2.14148	2860.29	1.81749	39.9764	0.71122	1945.85	1.74211	314.205	5.70385	992.007	1.43695	1044.45	2.42691	58.0988	0.862753
	25Jun11A153	UG1-W-147	9.06066	0.0920555	19.168	0.195502	6.0433	1.72376	4862.07	1.28251	2858.52	1.10563	39.5405	0.4063	1922.72	1.06311	314.991	3.57703	986.011	0.878748	1041.57	1.28747	56.4283	0.926392
	25Jun11A154	UG1-W-148	9.07429	0.0772357	19.0779	0.16119	6.22319	1.94032	4810.31	1.11491	2841.63	0.951163	39.7503	0.357879	1914.39	0.877552	313.874	2.80458	980.666	0.776356	1030.39	1.04851	59.3377	1.01822
	25Jun11A155	UG1-W-149	9.17989	0.103642	19.0758	0.214696	5.74917	1.82096	4849.97	1.49429	2839.39	1.24684	39.7057	0.449183	1894.84	1.07806	314.394	3.56629	989.519	1.03999	1056.83	0.968607	58.243	1.00707
	25Jun11A156	UG1-W-150	9.10499	0.0878848	19.1865	0.170894	5.9712	2.05021	4824.94	1.49019	2843.38	1.101	39.592	0.399741	1910.81	1.00201	316.26	3.77493	993.197	0.910453	1037.21	1.28889	57.9246	0.795216
	25Jun11A157	UG1-W-151	9.01239	0.0981805	18.9297	0.201179	6.52495	2.11659	4868.22	1.47742	2885.86	1.12322	39.6636	0.403329	1947.43	1.05121	311.502	3.49538	989.375	0.962937	1049.7	1.09996	59.5068	1.07235
	25Jun11A158	UG1-W-152	9.04748	0.0982978	19.0099	0.209343	6.539	1.95403	4870.9	1.43965	2887.05	1.20079	39.5355	0.451766	1951.34	1.13425	312.566	3.59067	992.805	1.03578	1066.99	1.7129	59.6676	1.67976
	25Jun11A159	UG1-W-153	9.09447	0.0999464	19.0042	0.22341	6.38511	2.23793	4807.97	1.43367	2865.48	1.22891	39.6577	0.482547	1921.02	1.24414	314.113	3.78709	984.866	0.999828	1047.83	1.28187	57.0621	0.94159
	25Jun11A160	UG1-W-154	9.07091	0.109577	19.1188	0.227785	6.31508	2.08287	4917.35	1.62693	2897.28	1.30526	39.3729	0.491981	1928.65	1.27148	314.455	4.1681	990.1	1.04499	1019.88	1.37368	57.9005	1.03162
	25Jun11A161	UG1-W-155	9.0725	0.112373	19.0488	0.23511	6.1359	2.1181	4862.56	1.52064	2892.71	1.37709	39.4788	0.544451	1926.17	1.26766	312.249	3.76024	990.561	1.27917	1056.51	1.92123	57.0944	1.14538
	25Jun11A162	UG1-W-156	9.11272	0.103451	19.1499	0.211971	6.2052	1.82757	4853.79	1.63972	2889.43	1.23073	39.2771	0.4516	1929.25	1.16041	313.422	3.84275	986.252	0.903516	1004.14	1.44453	58.5793	0.927915
	25Jun11A163	UG1-W-157	9.1481	0.113753	19.0739	0.223205	6.43867	2.1013	4814.67	1.68447	2898.35	1.38522	39.4487	0.521208	1944.38	1.30114	312.612	4.01814	997.322	1.1878	1041.96	1.65305	57.5526	0.933486
	25Jun11A164	UG1-W-158	9.09824	0.110398	19.1474	0.228225	6.32902	1.98141	4872.42	1.52636	2890	1.27421	39.3518	0.452747	1922.89	1.20142	315.024	4.23856	1004.61	1.08064	1009.29	1.50825	56.7886	0.990984
	25Jun11A165	UG1-W-159	9.09942	0.104727	18.7844	0.203445	6.07881	1.76179	4848.01	1.45399	2886.02	1.14988	39.7462	0.446813	1932.6	1.05063	313.941	3.43596	980.606	1.00969	987.961	1.40191	57.1547	0.971942
	25Jun11A166	UG1-W-160	9.10704	0.101372	19.0516	0.196485	6.29642	1.92717	4872.15	1.3141	2884.75	1.10191	39.5481	0.451085	1938.59	1.16084	312.061	3.37276	994.205	1.07501	1039.01	1.51105	58.1437	0.937149
	25Jun11A167	UG1-W-161	9.25514	0.0800969	18.5074	0.169005	7.06397	2.29182	4943.81	1.22698	2856.82	1.0551	40.037	0.37999	1952.47	0.895151	313.22	3.12778	986.296	0.827313	1041.67	1.04717	56.4882	0.85313
	25Jun11A168	UG1-W-162	9.05999	0.0823169	19.7368	0.166569	6.70048	2.29047	4913.7	1.25089	2951.76	1.00865	38.5966	0.384875	1896.94	0.849789	307.264	2.96111	1037.75	0.757816	1026.55	1.20328	58.8266	0.852065
	25Jun11A169	UG1-W-163	9.11845	0.0795095	18.8753	0.163937	6.57545	2.22456	4923.24	1.30715	2850.23	1.0475	39.9884	0.494918	1916.72	0.859828	312.307	3.46412	995.07	0.899507	1041.73	1.54905	55.9017	1.00491
	25Jun11A170	UG1-W-164	9.0612	0.104402	18.7521	0.156	6.72826	1.98471	4856.07	1.30264	2854.38	0.898118	39.8367	0.354762	1933	0.868015	310.482	2.63928	975.751	0.747081	1032	1.2272	56.4907	0.868935
	25Jun11A171	UG1-W-165	9.2053	0.0991215	18.8934	0.209585	6.61294	2.21107	4997.59	1.5041	2827.65	0.982835	40.1464	0.450606	1953.48	0.897505	310.852	3.24676	966.951	0.916135	997.851	1.0514	56.5563	0.967379
	25Jun11A172	UG1-W-166	9.06349	0.0862736	18.9865	0.180793	6.54596	1.98194	4954.06	1.50876	2888.22	1.23037	39.5834	0.421261	1941.52	1.16068	308.527	3.4963	997.851	1.02373	1030.07	1.37737	57.9919	0.999339
	25Jun11A173	UG1-W-167	9.26246	0.0783133	18.3806	0.159367	6.30905	2.03564	4882.67	1.33752	2878.07	1.07544	39.5874	0.404972	1920.82	0.99104	310.376	3.16844	991.879	0.895407	1040.78	1.53037	59.1111	1.05877
	25Jun11A174	UG1-W-168	9.08472	0.0998043	19.5434	0.170328	6.54185	2.16764	4837.79	1.23439	2853.36	0.893944	40.1305	0.308079	1948.73	0.861098	313.732	2.69707	961.351	0.78118	1078.9	1.55798	56.6894	0.813735
	25Jun11A175	UG1-W-169	9.08489	0.0881888	18.6089	0.21268	6.76046	2.07049	4918.6	1.17732	2908.22	0.90697	39.0971	0.320156	1903.84	0.865694	312.759	3.05617	1002.68	0.891965	1001.14	1.30334	59.1658	0.974391
	25Jun11A176	UG1-W-170	9.03654	0.0907802	18.8393	0.185026	6.54136	2.00984	4874.16	1.39569	2868.82	1.23215	40.0345	0.492452	1959.21	1.21139	310.907	3.6872	981.755	1.02605	1087.24	1.15251	59.4456	1.20583
	25Jun11A177	UG1-W-171	9.13092	0.115528	19.0924	0.176024	6.66091	2.28364	4874.06	1.54867	2863.25	1.29593	40.0661	0.488056	1943.2	1.16087	312.336	3.83489	968.874	1.02587	1028.12	1.28936	57.9354	0.8989
	25Jun11A178	UG1-W-172	9.11898	0.159353	18.9681	0.225716	6.63412	2.31941	4854.48	1.45854	2845.12	1.17731	39.8749	0.432544	1946.69	1.08132	311.358	3.10847	962.76	0.931844	1019.69	1.20617	58.1368	1.38561
	25Jun11A179	UG1-W-173	9.08557	0.0765382	18.4162	0.267846	6.63282	2.17801	4889.61	1.46912	2865.78	1.03417	39.9112	0.37775	1929.9	0.996499	314.457	3.25061	983.39	0.869352	1032.74	1.15801	58.0165	1.33286
	25Jun11A180	UG1-W-174	9.09909	0.119493	19.1865	0.161565	6.52214	2.0516	4905.07	1.42752	2869.21	1.05534	39.7341	0.443319	1928.55	1.00148	309.408	3.27378	1006.49	1.07091	1092.04	1.43583	56.9325	0.960814
	25Jun11A181	UG1-W-175	9.05458	0.0908468	18.7326	0.195767	6.57746	2.15801	4887.09	1.36177	2873.06	0.996893	39.8985	0.391154	1943.29	0.873295	310.892	2.8532	992.023	1.26922	1064.79	2.00578	57.8706	0.998235
	25Jun11A182	UG1-W-176	9.05053	0.0907237	18.1101	0.176991	6.29065	2.13759	4880.33	1.5639	2883.75	1.29931	39.9517	0.519866	1924.89	1.25979	311.366	3.99896	998.798	1.12192	1020.19	1.45303	59.1398	0.80966
	25Jun11A183	UG1-W-177	8.91761	0.0997384	18.1213	0.213756	6.95585	1.87885	4902.86	1.63357	2906.2	1.25866	40.1465	0.500292	1920.19	1.04071	309.608	3.64302	991.699	1.08824	1042.02	1.59708	57.3627	0.988588
	25Jun11A184	UG1-W-178	9.20988	0.115178	18.452	0.236381	6.59127	2.16907	4924.83	1.32369	2889.29	1.066	40.0351	0.427718	1970.14	1.18966	311.64	3.43155	990.552	1.00971	1022.79	1.78221	56.2854	1.28915
	25Jun11A185	UG1-W-179	9.22473	0.125996	18.5697	0.252184	6.41308	1.64619	4883.39	1.21062	2886.04	1.11434	40.3044	0.413451	1926.42	1.10339	312.965	3.10882	970.001	0.929807	1027.16	1.58727	60.9298	1.41246
	25Jun11A186	UG1-W-180	9.06954	0.100553	18.3679	0.203574	6.27853	2.02858	4849.31	1.99422	2887.97	1.74941	40.2451	0.762187	1974.72	1.7342	312.273	5.06558	985.58	1.56515	1095.07	1.53377	58.4562	1.30705
	25Jun11A187	UG1-W-181	9.08584	0.0783785	18.4138	0.165525	6.90046	2.35066	4787.31	1.26071	2858.56	1.03103	40.7026	0.42654	1920.06	0.886534	312.796	2.97516	964.681	0.868119	1051.88	1.23677	55.7752	0.954637
	25Jun11A188	UG1-W-182	9.13522	0.0782409	18.943	0.162611	6.83704	2.21186	4857.71	1.17636	2877.99	0.930865	40.2877	0.337734	1938.96	0.848674	309.535	2.60481	968.468	0.72601	1039.87	1.26639	55.6429	1.00568
	25Jun11A189	UG1-W-183	9.06073	0.0806148	18.5635	0.16696	6.99015	2.0559	4951.68	1.52885	2924.62	0.909704	39.6815	0.344152	1912.09	0.912019	311.199	2.9572	998.623	0.839086	1039.41	1.46817	55.4361	0.9845
	25Jun11A190	UG1-W-184	9.10614	0.111439	18.7506	0.220234	6.9505	2.11916	4988.81	1.33681	2863.86	0.902428	40.3523	0.386745	1950.3	0.932449	309.133	2.73739	957.192	0.672524	1023.19	1.20573	56.3064	1.08427
	25Jun11A191	UG1-W-185	9.12722	0.0924919	18.9567	0.164157	6.88556	2.0784	4780.5	1.1804	2843.54	0.89135	40.8056	0.367826	1946.25	0.85117	308.762	2.62388	940.446	0.690249	1045.7	1.26654	57.1113	1.03184
	25Jun11A192	UG1-W-186	9.03589	0.0840496	18.4158	0.172468	6.50983	2.09573	4857.99	1.83523	2855.36	1.47745	39.4091	0.65945	1932.78	1.31709	314.826	5.33498	945.646	1.11732	1069.64	1.38134	56.7975	0.849945
	25Jun11A193	UG1-W-187	9.07111	0.116586	18.5167	0.22149	6.26715	1.96347	4974.49	1.93542	2917.15	1.57255	39.6521	0.568398	1909	1.3456	309.684	4.6804	1011.84	1.39359	1047.13	1.77649	57.9954	0.945584
	25Jun11A194	UG1-W-188	9.11471	0.112741	18.6035	0.202333	6.32322	2.21446	4962.83	1.66631	2881.61	1.44099	40.0743	0.603229	1918.18	1.32906	310.622	4.70431	977.372	1.21343	1020.35	1.52339	56.8085	0.847224
	25Jun11A195	UG1-W-189	8.96886	0.116571	18.6139	0.233063	6.38718	2.28654	4902.97	1.72669	2850.72	1.27975	40.2565	0.344516	1925.27	1.30372	312.324	3.98624	947.551	1.02524	1033.26	1.398	56.6219	0.955461
	25Jun11A196	UG1-W-190	9.14017	0.117954	19.0411	0.269568	6.42646	2.01634	4897.86	1.73098	2843.8	1.38932	40.1242	0.582936	1935.9	1.23696	309.005	4.19278	959.592	1.11663	1008.23	1.39348	58.6331	1.03693
	25Jun11A197	UG1-W-191	8.97923	0.0960778	18.4877	0.198018	6.41565	2.02181	4831.95	1.40603	2866	1.09217	40.0364	0.497679	1979.2	1.12009	313.01	3.50511	957.2	0.91346	1043.13	1.44464	58.017	1.04721
	25Jun11A198	UG1-W-192	9.03937	0.0914918	18.8957	0.175775	6.44182	2.39022	4926.11	1.48567	2876.64	1.39212	40.3609	0.418552	1963.36	1.30936	308.139	3.93238	966.013	1.05177	1025.36	1.56819	57.8758	0.982565
	25Jun11A199	UG1-W-193	9.09202	0.0929943	18.5153	0.179954	6.64394	1.89889	4953.31	1.30058	2847.94	1.03653	40.5181	0.396717	1929.15	0.994967	309.36	3.11641	967.133	0.892269	1058.46	1.51047	56.7822	1.04105
	25Jun11A200	UG1-W-194	9.02991	0.105443	18.4614	0.225429	6.37947	2.06201	4943.23	1.0846	2840.18	0.994647	40.6705	0.520664	1912.48	0.909953	310.756	3.02877	955.542	0.79733	1017.05	1.41181	59.5363	0.985635
	25Jun11A201	UG1-W-195	9.02984	0.112497	18.5362	0.189182	6.4745	2.03393	5022.5	1.43965	2856.72	1.12353	39.9051	0.574254	1898.52	1.03657	311.875	3.23434	965.193	0.884583	1055.36	1.92665	57.4342	0.94462
	25Jun11A202	UG1-W-196	8.92097	0.0875255	18.6243	0.180052	6.57243	1.90335	5038.02	1.22346	2860.69	1.03918	39.7309	0.41788	1942.12	1.15413	310.86	3.19985	972.948	1.01013	1039.23	1.79184	56.8762	0.867122
	25Jun11A203	UG1-W-197	8.99701	0.0921458	18.6222	0.183521	6.48298	1.87868	4996.79	1.49407	2836.71	1.21933	39.7453	0.419531	1937.98	1.11222	310.199	3.55741	979.666	0.950778	1035.05	1.49912	59.8761	1.04258
	25Jun11A204	UG1-W-198	9.0671	0.0913539	18.7054	0.17571	6.17925	1.75624	5020.72	1.74045	2829.44	1.30349	39.6167	0.437974	1930.16	1.28034	310.263	4.10352	988.731	1.16629	1038.45	1.243	57.0571	0.733592
	25Jun11A205	UG1-W-199	9.0633	0.104659	18.6294	0.203082	6.39484	2.22962	4983.02	1.78436	2846.27	1.50561	39.4413	0.461492	1896.47	1.4463	311.994	4.5569	977.422	1.32423	1063.37	1.48496	57.898	1.12813
	25Jun11A206	UG1-W-200	8.93914	0.104964	18.5086	0.226292	6.61668	2.40719	4924.81	1.43242	2823.77	1.18138	39.782	0.526353	1947.72	1.21966	307.19	3.47816	977.527	1.04709	1050.28	1.45037	59.4942	1.17266
	25Jun11A207	UG1-W-201	9.13033	0.085429	18.8984	0.177493	6.75995	2.30211	4726.5	1.18376	2829.27	0.949837	39.3297	0.3916	1910.17	0.815331	306.076	2.48622	936.775	0.742507	1053.77	1.35654	60.893	1.29087
	25Jun11A208	UG1-W-202	9.22177	0.0829481	19.2344	0.166389	6.72284	1.92452	4819.21	1.22636	2876.25	0.958732	38.9182	0.343861	1895.12	0.839302	308.782	2.80374	972.464	0.731816	1058.66	1.50014	56.4322	0.925424
	25Jun11A209	UG1-W-203	9.16342	0.0989509	19.032	0.202297	6.69238	2.37236	4734.41	1.15718	2844.68	0.91346	39.1751	0.468963	1890.39	0.89531	307.322	2.87579	955.937	0.814654	1010.2	1.07276	55.6531	0.942498
	25Jun11A210	UG1-W-204	9.0914	0.0873851	18.7026	0.190746	6.71862	2.50957	4817.48	1.56949	2863.46	1.18566	39.1747	0.402188	1895.86	1.13317	307.076	3.41802	955.684	1.02115	1064.55	1.45286	56.7057	0.892552
	25Jun11A211	UG1-W-205	9.09953	0.0684548	18.2656	0.121062	6.69444	1.77924	4764.83	1.12905	2874.74	0.938318	38.9723	0.312634	1894.79	0.927367	304.66	2.61801	986.337	0.726234	1014.85	1.73585	57.7517	1.01265
	25Jun11A212	UG1-W-206	9.16323	0.121442	19.0476	0.259421	6.69441	2.53305	4894.32	1.22868	2850.96	1.02482	38.9986	0.535287	1907.72	0.937798	307.37	3.04757	958.655	0.912134	1014.68	1.85007	59.1947	1.62855
	25Jun11A213	UG1-W-207	9.08352	0.0872853	18.9597	0.178325	6.71429	2.2251	4805.34	1.63156	2899.54	1.3862	39.3246	0.373322	1876.17	1.19923	309.265	4.08717	970.64	1.16591	993.947	1.60792	56.0364	0.893862
	25Jun11A214	UG1-W-208	9.10882	0.0815501	19.1402	0.191934	6.7021	2.1457	4810.14	1.54159	2857.19	1.2458	38.9613	0.372896	1904.01	1.22626	311.65	4.73367	968.785	1.15719	985.688	1.3488	56.4273	0.933197
	25Jun11A215	UG1-W-209	9.20867	0.0780165	19.1169	0.174387	6.68709	2.03851	4833.2	1.68047	2864.59	1.41563	39.0985	0.364067	1910.46	1.35693	310.358	4.2935	931.312	1.10989	1001.46	1.26416	57.234	0.930302
	25Jun11A216	UG1-W-210	9.18327	0.0910244	19.1477	0.178356	6.67555	2.04776	4920.52	1.90153	2906.79	1.57234	39.049	0.417937	1860.51	1.33794	304.992	4.32092	983.728	1.2286	1008.84	1.77812	57.6686	1.03186
	25Jun11A217	UG1-W-211	9.18123	0.104262	18.8875	0.222089	6.72115	2.13207	4818.5	1.36508	2865.79	1.13627	39.138	0.443371	1889.33	1.04283	306.663	3.48188	960.596	0.916722	999.272	1.51245	57.1556	0.995423
	25Jun11A218	UG1-W-212	9.17006	0.0858585	19.1213	0.184005	6.71997	2.18227	4852.56	1.31212	2850.72	1.12272	39.0935	0.389301	1952.98	0.97296	312.602	3.31823	939.243	0.900346	1021.26	1.55206	58.2728	0.915171
	25Jun11A219	UG1-W-213	9.10595	0.167928	18.2069	0.311263	6.68345	1.97226	4874.7	1.3048	2860.57	1.06955	40.0498	0.741007	1909.85	1.00206	310.748	3.1648	970.295	0.8117	992.261	1.50185	60.6662	1.00172
	25Jun11A220	UG1-W-214	9.43064	0.127476	19.6944	0.272858	6.69574	1.87412	4809.62	1.52354	2854.7	1.38873	38.3451	0.54286	1903.71	1.28894	313.316	3.72385	970.822	1.11763	960.933	1.21739	58.532	0.875879
	25Jun11A221	UG1-W-215	9.24964	0.116151	19.1578	0.231681	6.67288	2.33035	4896.62	1.35506	2822.91	1.22631	39.1292	0.51268	1888.57	1.04572	312.802	4.05007	964.676	1.11845	1041.96	2.00636	57.3364	0.799295
	25Jun11A222	UG1-W-216	9.11823	0.116481	18.8332	0.244452	6.65708	2.25559	4872.4	1.21753	2838.24	1.0587	39.4535	0.534709	1920.62	0.983995	311.863	3.05117	937.942	0.791409	1033.91	1.30805	57.7964	0.924624
	25Jun11A223	UG1-W-217	9.25484	0.122986	18.7257	0.216606	6.60022	2.2975	4906.31	1.25281	2816.34	1.12732	39.4852	0.541873	1909.68	0.995683	313.432	3.15508	933.136	0.807224	994.734	1.21288	58.2433	0.968478
	25Jun11A224	UG1-W-218	9.17478	0.132742	18.7195	0.259528	6.71619	2.50284	4999.84	1.21783	2827.67	1.03843	39.3688	0.634005	1907.07	0.993656	310.896	3.05655	961.591	0.869119	1015.52	1.12412	58.5349	0.89123
	25Jun11A225	UG1-W-219	9.21902	0.11178	19.034	0.239478	6.69529	1.96745	4775.25	1.31915	2847.93	1.13576	39.1043	0.468923	1921.83	1.13745	313.945	3.94236	959.268	1.01013	1047.25	1.25817	60.1962	0.965174
	25Jun11A226	UG1-W-220	9.2208	0.111909	18.9831	0.225373	6.71872	2.31171	4913.05	1.48894	2851.1	1.30228	39.3664	0.508956	1902.73	1.16351	313.767	3.9702	958.996	0.973834	1032.98	1.20425	58.6742	0.952364
	25Jun11A227	UG1-W-221	9.19582	0.201006	18.6395	0.39737	6.3462	1.94092	4910.58	1.27547	2855.77	1.06479	39.4951	0.926315	1907.68	0.89976	309.152	2.90928	960.145	0.767921	1075.33	1.43092	58.1901	0.842795
	25Jun11A228	UG1-W-222	9.01466	0.145879	18.6158	0.295383	6.3661	2.19983	4936.85	1.19442	2941.84	0.918008	40.172	0.664272	1906.34	0.799438	310.266	2.71253	978.309	0.768014	1036.22	1.08651	60.0446	1.09191
	25Jun11A229	UG1-W-223	9.15643	0.0838032	18.8809	0.180912	6.00859	2.51784	4894.06	1.49612	2925.38	1.16218	39.3646	0.38463	1899.73	0.980493	309.15	3.27147	966.09	0.887051	1065.22	1.13205	56.2524	1.13938
	25Jun11A230	UG1-W-224	9.19504	0.100526	19.0299	0.198396	6.88789	2.58777	4839.58	1.34871	2886.31	1.11857	39.4067	0.490515	1916.71	0.958471	309.712	2.99263	936.072	0.788204	1095.51	2.28691	61.374	0.928197
	25Jun11A231	UG1-W-225	9.19399	0.169333	18.8227	0.313115	6.83346	2.6906	4893.49	1.10021	2873.09	1.91199	39.3885	0.722998	1958.64	0.705833	309.108	2.8474	923.321	0.55198	984.641	1.14216	59.5571	0.96201
	25Jun11A232	UG1-W-226	9.26202	0.149179	18.9129	0.311506	6.64031	2.59968	4898.06	1.81487	2868.27	1.75739	39.0135	0.627571	1926.38	1.32617	309.91	3.93768	979.955	1.06491	1000.11	1.41697	58.2812	1.06789
	25Jun11A233	UG1-W-227	9.18328	0.123197	19.0496	0.266907	6.56988	2.0715	4857.81	1.39686	2903.87	1.08441	39.1421	0.638669	1925.87	0.904872	311.817	2.98982	959.303	0.798155	1031.56	1.13972	59.3963	0.937754
	25Jun11A234	UG1-W-228	9.09866	0.176096	18.5566	0.343239	6.69205	1.92993	4878.89	1.21281	2901.94	1.1437	39.6274	0.857022	1908.48	0.935508	308.696	2.91243	972.884	0.880547	1064.74	1.5399	60.2198	1.24339
	25Jun11A235	UG1-W-229	9.14573	0.143071	18.8633	0.297588	6.62163	2.57674	4914.26	1.10964	2914.3	1.94969	39.1924	0.682007	1918.46	0.928422	308.945	5.08874	988.206	0.784029	1002.34	1.09943	58.9213	0.980824
	25Jun11A236	UG1-W-230	9.1424	0.143756	18.5556	0.292792	6.81641	2.43535	4891.85	1.39858	2909.17	2.15617	39.6138	0.708894	1905.18	0.917908	311.788	4.98164	980.248	0.82406	1053.59	1.15146	59.0195	1.12541
	25Jun11A237	UG1-W-231	9.29935	0.16097	19.2011	0.329051	6.67384	2.37242	4911.79	1.69387	2907.34	1.7538	38.9031	0.741912	1920.5	1.09338	315.922	5.5689	957.492	0.931791	1021.48	1.79557	59.5059	1.88142
	25Jun11A238	UG1-W-232	9.22712	0.18503	18.9398	0.390617	6.83801	2.58856	4887.37	1.23577	2906.79	1.7955	39.3318	0.896105	1926.5	0.927485	313.588	6.97226	972.864	0.790176	1041.13	1.24006	57.9701	0.914062
	25Jun11A239	UG1-W-233	9.0222	0.149455	18.3802	0.296488	6.64774	2.40237	4735.29	2.3673	2924.33	2.38318	39.9454	0.701313	1987.76	1.81383	308.361	4.90552	953.623	1.39141	1072.19	1.26571	59.4807	0.955023
	25Jun11A240	UG1-W-234	9.06004	0.145987	18.3922	0.285145	6.83508	2.38951	5020.21	2.03315	2903.55	1.76987	40.0755	0.704257	1866.1	1.29534	310.132	5.01629	995.755	1.17957	1128.25	1.73025	59.2515	1.38862
	25Jun11A241	UG1-W-235	9.0886	0.155001	18.4564	0.317387	6.88232	2.71595	4917.42	1.60408	2881.26	1.82667	39.9159	0.672057	1901.48	1.28428	316.879	5.65225	981.859	1.11488	1081.28	1.73121	58.7081	1.23635
	25Jun11A242	UG1-W-236	8.99529	0.130863	18.2226	0.258718	6.73228	2.9212	4879.37	1.74573	2877.6	1.57134	40.0056	0.597873	1926.43	1.31789	311.733	4.35657	957.956	1.18139	998.32	0.995993	60.3243	1.35335
	25Jun11A243	UG1-W-237	9.0564	0.142991	18.2484	0.314653	6.91991	2.70213	4839.26	1.61397	2865.81	1.78614	40.2906	0.735792	1914.44	1.21323	310.673	5.21958	980.513	1.1198	1046.32	1.32737	57.9411	1.59747
	25Jun11A244	UG1-W-238	9.00676	0.164262	18.3226	0.328072	7.01058	2.32376	4911.49	1.80734	2887.43	2.02124	40.126	0.776641	1929.35	1.51497	312.879	5.92528	960.141	1.3435	1066.22	1.10144	59.0105	1.29638
	25Jun11A245	UG1-W-239	9.10745	0.1349	18.6207	0.275617	7.09423	2.5395	4930.39	1.70461	2888.92	1.74399	39.8844	0.627469	1921.06	1.15642	314.05	5.17623	973.988	1.02383	1047.87	0.95506	58.0423	1.33252
	25Jun11A246	UG1-W-240	9.10231	0.15781	18.5024	0.315498	7.17473	2.45063	4942.37	1.71376	2895.4	1.92293	39.7844	0.721345	1923.72	1.31741	308.721	5.11581	970.3	1.13422	1066.08	1.23627	58.9738	1.63343
	25Jun11A247	UG1-W-241	9.03448	0.0944031	18.8356	0.202933	7.34219	2.84638	4815.35	2.60596	2885.95	1.20132	39.4802	0.431787	1930.94	2.28545	310.418	2.96753	980.401	1.98519	1094.13	1.66792	55.3734	1.13485
	25Jun11A248	UG1-W-242	9.33995	0.0877696	19.0543	0.18877	7.47729	2.62844	4873.05	2.05926	2907.03	1.04515	38.1733	0.373165	1982.24	1.67914	309.416	2.81506	928.836	1.3861	1013.27	1.10511	58.3737	1.40951
	25Jun11A249	UG1-W-243	8.94393	0.089216	18.2986	0.180489	7.24618	2.28014	4897.18	1.33401	2845.97	1.13469	40.275	0.417827	1935.49	1.00122	308.799	2.87629	957.534	0.801523	1061.97	1.50752	56.248	1.21357
	25Jun11A250	UG1-W-244	9.15686	0.0953769	19.1844	0.204535	7.22329	2.54881	4838.27	1.42411	2912.57	1.17606	39.218	0.415534	1906.94	1.02371	312.494	3.31283	963.833	0.892205	1043.55	1.86217	56.1791	1.01961
	25Jun11A251	UG1-W-245	9.05234	0.0847316	18.5472	0.17811	6.67631	2.26682	4912.31	2.22093	2855.84	1.02491	39.9573	0.378311	1924.78	1.63815	311.15	2.85972	961.636	1.3997	1036.14	1.71083	56.3488	1.24157
	25Jun11A252	UG1-W-246	9.06883	0.0872844	19.027	0.19469	6.60187	2.07811	4959.96	2.0778	2883.78	1.0825	39.4017	0.402455	1935.96	1.61768	310.825	3.07161	974.094	1.3838	1018.96	2.0886	58.5819	1.67152
	25Jun11A253	UG1-W-247	9.1337	0.0771975	19.0129	0.168795	6.99128	2.23426	4953.14	1.86233	2892.94	0.972846	39.5027	0.354461	1902.92	1.42345	309.538	2.73806	976.88	1.27386	1059.13	2.1794	57.0941	1.08787
	25Jun11A254	UG1-W-248	9.14275	0.0882667	19.1442	0.187507	6.80157	2.08011	4906.88	2.6369	2896.12	1.05534	39.3947	0.383534	1922.92	1.91377	309.651	2.86051	968.095	1.80291	1029.74	1.5605	58.0822	1.4519
	25Jun11A255	UG1-W-249	9.05828	0.0943348	18.7772	0.205118	6.88213	1.80575	4987.75	2.24177	2868.48	1.17133	39.5075	0.404731	1914.19	1.65389	312.275	3.44481	965.916	1.47005	1027.74	1.45656	58.3116	1.05665
	25Jun11A256	UG1-W-250	9.10135	0.100965	18.8787	0.211479	6.88668	2.09044	4853.94	1.92993	2898.56	1.26842	39.6171	0.478962	1933.39	1.63321	310.35	3.50225	964.017	1.34498	1029.2	1.65585	56.1881	1.06196
	25Jun11A257	UG1-W-251	9.04469	0.0903073	18.6991	0.193446	7.16873	1.96979	4966.73	2.22683	2853.75	1.0873	39.4789	0.385659	1906.45	1.61277	309.335	2.94823	994.428	1.54462	986.449	1.35127	59.5637	1.18285
	25Jun11A258	UG1-W-252	9.24087	0.0982048	19.2907	0.212452	6.95104	1.97804	4910.02	2.6826	2913.57	1.16761	39.0579	0.438112	1930.77	2.09964	310.68	3.41261	989.614	1.97663	970.84	1.27233	55.7996	0.841719
	25Jun11A259	UG1-W-253	9.25585	0.0972443	19.8264	0.188243	7.00693	2.09367	4924.28	2.0539	2940.31	1.13561	38.5921	0.422478	1950.2	1.69617	313.101	3.23993	947.873	1.39346	999.343	1.20793	57.6295	0.843335
	25Jun11A260	UG1-W-254	9.36129	0.121976	19.91	0.289283	6.88703	2.11268	4836.53	2.16188	2956.41	1.58007	38.4525	0.592355	1944.73	1.6842	309.738	4.25946	963.297	1.40044	1024.31	1.81622	57.9257	0.851708
	25Jun11A261	UG1-W-255	9.02276	0.0938605	18.7822	0.208686	6.81596	2.04897	4862.52	2.20865	2882.67	1.23449	39.6732	0.455113	1909.34	1.73791	307.932	3.25215	953.076	1.58227	1008.51	1.38398	58.1771	0.814408
	25Jun11A262	UG1-W-256	9.06022	0.112122	18.8521	0.237764	6.81259	2.12069	4823.02	1.73765	2903.01	1.46388	39.6586	0.51983	1945.63	1.35193	310.251	3.6638	948.981	1.09866	1045.83	1.33593	56.2765	0.786532
	25Jun11A263	UG1-W-257	9.13031	0.100835	19.0146	0.225149	6.61194	2.01675	4822.36	2.12193	2912.83	1.24192	39.3722	0.463899	1937.86	1.60899	308.639	3.44849	924.295	1.30112	1107.97	1.55102	57.3095	0.959283
	25Jun11A264	UG1-W-258	9.08696	0.105612	18.5582	0.21246	6.52743	2.48034	4828.99	2.25695	2867.13	1.2966	39.917	0.506845	1945.95	1.843	312.91	3.48701	950.504	1.64789	997.015	1.31781	57.3402	1.00847
	25Jun11A265	UG1-W-259	9.0894	0.13263	18.5583	0.249759	6.66551	2.15459	4809.99	2.03515	2885.22	1.54476	39.7369	0.601701	1894.32	1.53179	311.434	4.37486	943.649	1.32042	1009.42	1.26838	58.8579	0.888674
	25Jun11A266	UG1-W-260	9.22299	0.107069	19.5094	0.229593	6.51579	2.10469	4814.07	2.15923	2954.73	1.4234	38.7667	0.539898	1902.35	1.72107	312.334	3.98043	950.548	1.57311	1025.17	1.31721	57.0608	0.856799
	25Jun11A267	UG1-W-261	9.09552	0.13611	18.769	0.270795	6.56207	1.90327	4861.78	1.34387	2890.42	1.7195	39.7876	0.651598	1926.85	0.993033	313.55	4.87966	987.483	0.851965	993.678	1.84414	58.2757	1.00688
	25Jun11A268	UG1-W-262	9.03012	0.105878	18.5781	0.20285	6.70714	2.00628	4922.98	1.16765	2851.92	1.30686	40.058	0.55751	1876.71	0.90347	311.08	3.48799	1047.15	0.805301	1029.88	1.59321	59.7426	1.00082
	25Jun11A269	UG1-W-263	9.00665	0.105988	18.2882	0.224326	6.75491	2.12306	4805.7	1.1936	2843.02	1.2731	40.2542	0.541192	1935.4	0.916486	312.312	3.77159	943.003	0.808473	1052.14	1.4513	55.8231	1.05364
	25Jun11A270	UG1-W-264	9.12858	0.114714	18.7266	0.221405	6.36312	2.05064	4900.4	1.36969	2846.73	1.24714	39.7551	0.512735	1893.96	1.01501	312.726	3.92345	998.44	0.974742	1057.45	1.10298	57.9933	1.87433
	25Jun11A271	UG1-W-265	9.26864	0.0956894	19.4944	0.18801	6.66245	2.37531	4763.07	1.24449	2925.51	1.13789	38.6566	0.424766	1922.17	0.920692	312.716	3.24082	949.894	0.766583	1020.19	1.43123	61.6441	0.9974
	25Jun11A272	UG1-W-266	9.22029	0.106599	19.0943	0.191346	6.58887	1.926	4823.78	1.27022	2908.37	1.29151	39.3238	0.489045	1915.94	0.985766	314.298	3.51463	976.42	0.834033	1021.4	1.34809	58.2592	1.27781
	25Jun11A273	UG1-W-267	9.15805	0.123703	18.7072	0.245826	7.14762	2.31389	4879.91	1.23549	2884.82	1.55639	39.6759	0.567825	1906.88	0.842503	314.495	4.4393	982.135	0.774634	997.205	1.3831	56.6608	1.03397
	25Jun11A274	UG1-W-268	9.1058	0.10869	18.7035	0.209191	6.72849	2.21095	4908.09	1.32841	2888.52	1.21673	39.7609	0.472049	1904.07	0.932258	312.044	3.61134	967.301	0.792499	1012.26	1.24979	56.6706	0.926322
	25Jun11A275	UG1-W-269	9.04335	0.110835	18.3288	0.216366	6.6487	1.81853	4853.95	1.45933	2849.64	1.35562	40.0645	0.546809	1932.55	1.06266	311.718	3.99888	965.066	0.841401	1041.57	1.3533	60.4129	0.874547
	25Jun11A276	UG1-W-270	9.07311	0.172753	18.2421	0.337208	6.59368	2.00979	4892.87	1.62315	2846.85	2.20344	40.1993	0.920914	1908.04	1.08268	316.909	6.61741	952.026	0.955971	1037.13	1.40661	59.2739	1.03369
	25Jun11A277	UG1-W-271	9.0763	0.124136	18.5286	0.251769	6.77766	1.90064	4848.95	1.39243	2847.66	1.4794	40.0135	0.60901	1907.32	0.999121	311.397	4.37068	967.727	0.862218	1009.75	1.10785	57.8507	1.12689
	25Jun11A278	UG1-W-272	9.10095	0.109357	19.0147	0.226689	6.82794	1.92757	4941.01	1.33005	2888.85	1.31772	39.4573	0.493354	1899.91	1.01997	311.833	3.68052	988.135	0.913277	1034.16	1.17989	57.2437	0.873742
	25Jun11A279	UG1-W-273	9.01308	0.116751	18.3705	0.231493	6.35236	1.76221	5004.72	1.38003	2831.82	1.36847	40.2212	0.556191	1878.41	1.00677	313.55	4.21647	1032.43	0.821909	1118.79	2.2865	57.3702	1.05554
	25Jun11A280	UG1-W-274	9.07072	0.153725	19.204	0.328015	6.35938	2.36336	4966.46	1.9538	2895.3	2.09784	39.4866	0.930721	1851.79	1.31983	310.599	5.8524	1050.98	1.35644	1020.02	1.46814	58.6814	1.75308
	25Jun11A281	UG1-W-275	9.1645	0.101186	19.3607	0.209839	6.48124	1.98416	4913.07	1.4117	2892.53	1.23247	39.166	0.525379	1908.52	1.06317	311.676	3.5917	972.929	0.939841	997.265	1.13851	57.5854	1.16167
	25Jun11A282	UG1-W-276	9.12719	0.14658	18.7408	0.258057	6.84342	1.61219	4903.05	1.60779	2891.85	1.7022	39.7831	0.716062	1903.45	1.26166	313.045	5.27378	975.283	1.1123	1009.81	1.35081	57.4357	0.860479
	25Jun11A283	UG1-W-277	9.17672	0.115871	18.9694	0.229642	6.88686	1.91263	4984.59	1.4409	2898.14	1.38461	39.3828	0.529391	1902.82	1.06968	310.377	4.41978	995.101	0.968136	1083.34	2.03702	55.5608	1.0767
	25Jun11A284	UG1-W-278	9.32275	0.148975	19.1066	0.277645	6.62363	2.34741	4909.71	1.69105	2912.05	1.76371	39.2487	0.666191	1912.41	1.13297	309.575	5.21778	974.755	1.06046	1041.04	1.53597	61.4593	1.81966
	25Jun11A285	UG1-W-279	9.08661	0.0965871	18.8293	0.181888	6.58585	2.03462	4918.28	1.76425	2882.35	1.15425	39.5346	0.458627	1927.56	1.44796	309.673	3.20347	968.466	1.22122	1057.76	1.36119	59.7238	0.925516
	25Jun11A286	UG1-W-280	9.23205	0.140241	19.0976	0.272361	6.58079	1.82765	4963.56	1.6567	2892.23	1.57753	39.2023	0.661132	1864.78	1.23182	309.512	4.63716	1038.62	1.22116	1025.37	1.36366	58.2513	1.36307
	25Jun11A287	UG1-W-281	8.94072	0.090184	18.5968	0.183628	6.67729	2.18652	4875.8	1.98382	2846.5	1.1193	39.6262	0.397414	1914.01	1.56742	306.873	2.8941	968.635	1.41971	1054.89	1.59743	58.1886	1.06099
	25Jun11A288	UG1-W-282	8.97965	0.0883476	18.7173	0.191249	6.55204	2.14564	4838.99	1.51869	2848.72	1.10867	39.6865	0.58781	1909.55	1.22801	304.649	3.0179	964.816	1.06904	1016.99	1.38488	59.7547	1.32088
	25Jun11A289	UG1-W-283	9.00496	0.0819338	18.6657	0.172289	6.60083	2.0083	4932.78	1.54741	2865.13	1.00914	39.5946	0.412835	1957.69	1.2085	307.725	3.06182	946.52	1.01857	1029.73	1.31433	57.9814	0.952776
	25Jun11A290	UG1-W-284	9.18662	0.0911459	18.4816	0.193874	6.27762	2.28447	4931.14	1.60824	2876.19	1.18762	39.644	0.431233	1918.38	1.26506	309.395	3.29861	970.723	1.00463	1007.18	2.14394	58.2603	1.3185
	25Jun11A291	UG1-W-285	9.12664	0.125257	18.9145	0.261871	7.02579	2.03197	4828.32	1.5395	2881.99	1.63101	39.3175	0.595341	1891.67	1.038	305.533	4.29089	1016.81	0.888964	984.743	1.42154	56.7466	1.06569
	25Jun11A292	UG1-W-286	9.11767	0.0818792	18.8517	0.167677	6.72467	2.04616	4787.96	1.35571	2872.76	0.978255	39.3729	0.354805	1898.12	1.14613	308.417	2.82637	980.338	0.932022	977.545	1.36873	57.2353	0.979845
	25Jun11A293	UG1-W-287	9.14197	0.0812869	18.8673	0.164505	7.27104	2.2844	4778.47	1.86245	2905.34	1.00029	39.3237	0.361742	1933.77	1.39592	306.051	2.54846	967.33	1.20069	994.44	1.22957	56.8928	0.877905
	25Jun11A294	UG1-W-288	9.04192	0.0993107	18.6654	0.206088	6.6252	2.08426	4778.91	1.54506	2881.38	1.18718	39.7044	0.468929	1928.51	1.12732	309.87	3.46041	973.846	1.02568	1064.63	1.1935	56.3691	0.83575
	25Jun11A295	UG1-W-289	9.13244	0.130772	18.878	0.248768	6.66922	2.63012	4730.06	1.64725	2905.09	1.53363	39.3915	0.56183	1936.42	1.25971	308.501	4.37445	975.415	1.12822	983.46	1.35459	59.6541	1.15371
	25Jun11A296	UG1-W-290	9.13076	0.151214	18.996	0.304564	6.70171	2.11617	4898.41	2.73849	2890.87	1.78353	39.0901	0.773419	1936.25	2.14803	309.183	5.41731	959.853	1.75891	1046.04	1.60062	57.6281	0.875443
	25Jun11A297	UG1-W-291	9.01441	0.096895	18.7497	0.201558	6.60029	1.97087	4760.98	1.85633	2864.95	1.21332	39.4288	0.441296	1926.56	1.31832	309.154	3.41603	957.069	1.15852	1014.27	1.47295	59.2992	0.930994
	25Jun11A298	UG1-W-292	9.08314	0.0887466	18.7904	0.190732	6.67449	2.26999	4770.42	1.58093	2880.35	1.07555	39.4854	0.415549	1900.43	1.16784	308.782	3.07174	980.16	1.12577	1009.41	1.06936	57.6401	0.970002
	25Jun11A299	UG1-W-293	9.08782	0.0850084	18.6692	0.185707	7.05702	2.33575	4752.53	1.75563	2864.28	1.1512	39.5207	0.459968	1908.6	1.30166	306.218	2.98333	945.582	1.28597	1066.16	1.44179	58.8431	1.01136
	25Jun11A300	UG1-W-294	9.02284	0.0964792	18.6111	0.199156	6.70951	2.08973	4891.96	2.54126	2876.67	1.17646	39.3313	0.423279	1874.64	1.83563	310.558	3.34306	1012.33	1.93514	1015.36	1.65035	60.3188	1.2144
	25Jun11A301	UG1-W-295	8.99473	0.102176	18.5445	0.211806	7.21325	2.5301	4865.6	1.5959	2872.27	1.32112	39.5198	0.524867	1884.18	1.18949	308.557	3.81598	1004.7	1.14623	1003.64	1.37356	57.9881	0.993992
	25Jun11A302	UG1-W-296	9.0762	0.160088	18.7774	0.326452	7.00083	2.16027	4754.75	1.95805	2910.96	2.04543	39.4523	0.741645	1891.92	1.60996	308.528	5.48372	976.827	1.38183	1016.46	1.15575	58.2403	0.904546
	25Jun11A303	UG1-W-297	9.09717	0.102939	18.6648	0.209728	6.98755	2.0691	4776.29	1.80509	2868.03	1.33803	39.6216	0.476449	1913.74	1.28047	316.566	6.20654	994.711	1.19398	1026.09	1.23374	58.7881	0.831982
	25Jun11A304	UG1-W-298	8.94445	0.0966493	18.3957	0.207875	7.15625	1.90967	4901.58	1.92976	2865.24	1.23834	39.7508	0.506835	1912.63	1.61597	308.301	3.61061	996.682	1.4603	1057.38	4.53459	58.0169	0.942915
	25Jun11A305	UG1-W-299	9.10017	0.131893	18.7768	0.274972	6.93634	1.94396	4839.73	1.56604	2894.17	1.61323	39.309	0.612364	1898.63	0.995766	309.931	4.89918	981.041	0.986805	1094.13	1.82223	57.7867	0.966671
	25Jun11A306	UG1-W-300	9.08304	0.135929	18.4013	0.272	6.81822	2.43205	4868.96	2.00266	2872.58	1.67056	39.5628	0.611728	1898.14	1.47894	304.791	4.69781	995.403	1.43473	979.201	1.17384	59.3517	1.59145
	25Jun11A307	UG1-W-301	9.00977	0.129632	18.5211	0.269005	6.31759	1.84441	4895.16	1.37689	2865.79	1.53917	39.7345	0.609304	1939.55	0.943855	307.525	4.3232	973.158	0.868483	981.33	1.25839	56.142	0.831503
	25Jun11A308	UG1-W-302	9.05819	0.0920296	18.8034	0.199008	7.09954	1.90738	4911.02	1.37231	2864.57	1.17902	39.3073	0.417638	1902.62	1.02155	309.872	3.22994	974.391	0.871115	1059.25	1.19276	56.9617	0.90086
	25Jun11A309	UG1-W-303	9.11915	0.124933	18.7881	0.24265	6.78433	2.25235	4941.84	1.36366	2936.59	1.51615	39.3724	0.5017	1917.37	0.942851	312.05	4.22863	977.659	0.860392	1039.11	1.20323	58.5985	1.11459
	25Jun11A310	UG1-W-304	9.11626	0.157673	18.5733	0.306455	6.58211	1.83808	4912.1	1.52729	2874.44	1.94401	39.4471	0.702773	1922.91	1.01659	312.961	5.54532	963.385	0.853015	1072.41	0.992511	58.0236	1.27248
	25Jun11A311	UG1-W-305	9.04243	0.116355	18.9133	0.244609	6.62542	2.23796	4929.19	1.89892	2881.11	1.39963	39.2079	0.579351	1926.56	1.50254	309.306	4.10328	991.578	1.242	990	1.4845	58.2038	1.12735
	25Jun11A312	UG1-W-306	9.12508	0.120381	18.8692	0.261234	6.74056	2.20244	4899.34	1.30294	2882.96	1.5219	39.2102	0.518069	1891.43	0.882724	311.398	4.37465	969.633	0.710191	1018.07	0.924158	61.3353	4.65696
	25Jun11A313	UG1-W-307	8.95912	0.110884	18.357	0.225455	6.77643	1.83173	4973.06	1.27077	2848	1.38578	39.7793	0.531296	1907.7	0.917429	309.304	3.84328	976.941	0.78078	1034.09	1.47648	58.7029	1.20508
	25Jun11A314	UG1-W-308	9.15183	0.189472	18.4771	0.357841	6.52566	2.34606	4841.81	1.50494	2882.96	2.15558	39.5974	0.794528	1919.25	1.09665	315.437	6.69132	967.498	0.929867	997.062	1.08469	60.127	1.47699
	25Jun11A315	UG1-W-309	9.09873	0.127078	18.7299	0.250094	6.67017	2.03447	5013.42	2.09123	2902.1	1.56535	39.3463	0.588487	1903.6	1.31511	311.411	4.43159	980.416	1.1056	1005.06	1.21809	59.9265	1.14133
	25Jun11A316	UG1-W-310	9.08757	0.125416	18.7599	0.275394	6.72262	2.08179	4942.74	2.12816	2865.67	1.64625	39.1706	0.57711	1898.58	1.58064	309.973	4.79701	1013.24	1.57062	1020.83	1.14903	58.8055	1.11859
	25Jun11A317	UG1-W-311	9.27082	0.156975	18.8328	0.31272	6.81283	1.96243	4847.95	1.47022	2886.22	1.85188	39.1929	0.632845	1921.91	1.1141	311.305	5.25669	979.778	0.95893	1102.4	2.08054	57.1385	0.964029
	25Jun11A318	UG1-W-312	8.96405	0.112359	18.3633	0.231373	6.16889	2.29059	4877.13	1.47674	2865.2	1.42137	39.8621	0.577167	1904.74	0.969422	305.568	3.82795	991.136	0.885924	1020.97	0.99088	57.5388	1.52698
	25Jun11A319	UG1-W-313	9.2962	0.162176	19.2732	0.322765	6.59101	2.10376	5004.34	1.60496	2910.45	1.87002	38.9362	0.768604	1911.14	0.984932	310.884	5.76769	961.12	0.84851	1032.71	1.13568	59.1081	1.0951
	25Jun11A320	UG1-W-314	9.21357	0.136157	19.1329	0.278483	6.92575	2.2812	4911.59	1.89702	2905.85	1.67661	38.7177	0.582921	1925.54	1.01499	307.755	4.71762	975.06	0.868445	1047.38	1.07977	58.6721	1.20711
	25Jun11A321	UG1-W-315	9.09943	0.140074	18.7277	0.296701	6.74528	2.19634	4949.57	1.61344	2884.79	1.77939	39.4082	0.644989	1931.1	1.25385	310.25	4.90451	975.892	1.07766	1025.33	1.06971	59.5155	1.34977
	25Jun11A322	UG1-W-316	9.12121	0.146921	18.798	0.28761	6.45842	1.86089	4961.04	2.51142	2891.23	1.72043	39.3982	0.652139	1919.58	1.76534	315.494	7.66093	987.769	1.56045	1076.03	1.6348	57.7936	1.08372
	25Jun11A323	UG1-W-317	9.10832	0.143693	18.7691	0.290999	6.43434	2.20833	4820.86	1.59329	2905.82	1.68794	39.2635	0.676906	1896.63	1.11894	311.182	4.78408	963.602	0.923128	1000.95	1.10056	61.0175	1.51487
	25Jun11A324	UG1-W-318	9.29349	0.154845	19.0135	0.291197	6.66784	2.3266	4883.38	1.53755	2926.6	1.87484	38.7482	0.686541	1933.21	1.16191	310.151	5.35981	957.899	1.01802	1054.37	1.17902	59.3203	1.05696
	25Jun11A325	UG1-W-319	9.1224	0.131816	19.0099	0.271251	6.65249	2.03416	4976.14	2.26246	2909.35	1.65763	38.9411	0.597793	1934.15	1.55488	307.809	4.58621	996.886	1.45332	1077.56	1.41138	58.3967	1.29982
	25Jun11A326	UG1-W-320	9.1262	0.157198	18.8784	0.305195	6.61525	2.35194	4915.58	2.03484	2882.29	1.84779	39.0616	0.711654	1941.81	1.46395	305.418	5.46406	982.926	1.38258	1084.46	1.59716	60.681	1.19317
	25Jun11A327	UG1-W-321	9.20231	0.0907485	19.4637	0.186203	6.53169	2.05232	4910.59	2.11224	2898.01	1.08709	38.7739	0.387038	1922.78	1.46698	308.589	3.11739	973.848	1.25616	1052.48	1.60052	58.2909	1.14145
	25Jun11A328	UG1-W-322	9.13907	0.0806483	19.1057	0.171466	6.76447	2.45697	4850.28	1.43845	2862.69	0.980855	39.1503	0.359605	1915.72	1.02341	309.699	2.92093	984.123	0.950291	991.467	1.15783	59.7257	1.36195
	25Jun11A329	UG1-W-323	9.18483	0.0881558	19.2461	0.196275	6.63959	2.2119	5030.92	1.74967	2904.68	1.17833	39.0183	0.424977	1929.14	1.35476	307.686	3.26085	986.798	1.11184	1052.32	1.14433	59.2108	1.12129
	25Jun11A330	UG1-W-324	9.15183	0.102544	19.2094	0.207877	6.26731	2.20461	5007.25	2.40419	2876.46	1.18991	39.0093	0.452493	1943.69	1.71831	307.565	3.40381	1011.65	1.71627	1028.89	1.96344	59.4739	1.41049
	25Jun11A331	UG1-W-325	9.17948	0.108878	19.1899	0.227821	6.57123	2.22365	4870.91	1.73889	2921.63	1.45553	39.1007	0.474115	1914.72	1.35126	311.682	4.01235	1001.65	1.16579	1049.91	1.66481	59.888	1.1184
	25Jun11A332	UG1-W-326	9.1167	0.122052	18.7806	0.225191	6.76248	2.16857	4962.51	1.90693	2897.43	1.42436	39.5327	0.564484	1920.24	1.37373	307.082	3.59498	997.671	1.23538	1004.59	1.55897	59.4783	0.972385
	25Jun11A333	UG1-W-327	9.21371	0.117383	19.3197	0.24382	6.67001	2.35695	4897.43	1.75723	2884.13	1.33901	39.0504	0.530656	1949.27	1.22996	306.003	3.7585	967.759	1.10106	990.416	1.29888	59.3658	0.948389
	25Jun11A334	UG1-W-328	9.20936	0.0762166	19.4506	0.164418	6.66487	1.92672	4837.39	2.54102	2909.96	1.03065	38.832	0.353435	1935.59	2.06535	309.445	2.67546	972.976	1.73468	1030.68	1.04621	58.1706	0.899286
	25Jun11A335	UG1-W-329	8.9648	0.112005	18.2839	0.232765	6.67316	2.11255	4996.99	2.02626	2829.91	1.35738	40.011	0.535213	1917.82	1.3424	308.085	4.02744	984.297	1.26634	1021.26	1.78858	58.7961	1.04931
	25Jun11A336	UG1-W-330	9.20067	0.129354	19.2337	0.264074	6.56839	2.00647	4854.56	1.9211	2931.87	1.62982	39.0603	0.55903	1935.93	1.47084	311.108	4.22948	980.7	1.40718	1080.4	1.17509	58.7379	1.01192
	25Jun11A337	UG1-W-331	9.2064	0.124367	19.4404	0.277731	6.42777	2.27873	4992.12	2.21975	2893.55	1.59679	39.0807	0.604745	1917.3	1.70379	310.022	4.62059	996.122	1.42916	1001.67	1.29253	61.1531	0.975591
	25Jun11A338	UG1-W-332	9.16453	0.0974554	19.342	0.208394	6.66454	2.00685	4963.56	1.77889	2887.6	1.25752	39.0271	0.414649	1928.14	1.23426	309.44	3.6388	962.6	1.12509	1004.28	1.2361	59.4187	0.763795
	25Jun11A339	UG1-W-333	9.27399	0.127212	19.3019	0.246956	6.82843	2.06529	5018.23	2.15638	2916.93	1.55858	39.0882	0.609916	1893.96	1.78969	312.739	4.14394	1026.51	1.60781	1035.98	0.822729	55.9413	1.10173
	25Jun11A340	UG1-W-334	9.29624	0.107621	19.4632	0.212646	6.64565	2.32678	4957.34	1.96912	2889.08	1.23223	38.7079	0.443169	1904.54	1.47718	312.116	3.77121	1004.58	1.29235	1045.18	1.28381	60.0477	1.15561
	25Jun11A341	UG1-W-335	9.00788	0.0883931	18.5168	0.184108	6.32055	2.09595	4913.54	2.27054	2852.11	1.09827	39.7712	0.397076	1923.1	1.63387	311.462	2.96719	974.799	1.38179	1044.46	1.29564	59.604	1.23285
	25Jun11A342	UG1-W-336	9.04554	0.10719	18.644	0.226021	6.4454	2.03393	4899.32	1.95954	2882.01	1.35676	39.9909	0.522475	1909.9	1.53019	311.897	4.2914	1002.29	1.32129	1084.8	1.39455	60.1262	1.10504
	25Jun11A343	UG1-W-337	9.27046	0.0789694	19.4955	0.170125	6.20658	1.98887	5070.53	2.36128	2914.36	0.989834	38.9514	0.353623	1911.05	1.48455	310.04	2.64952	991.231	1.41646	1039.08	1.37808	61.8189	1.1573
	25Jun11A344	UG1-W-338	9.13109	0.103301	18.9376	0.219459	6.62472	2.05244	5010.25	2.17907	2896.12	1.2445	39.675	0.456373	1929.21	1.72724	312.972	3.47234	1028.37	1.59796	1027.54	1.79001	59.3443	0.947259
	25Jun11A345	UG1-W-339	9.12235	0.10203	19.0988	0.214986	6.51945	2.31134	4998.36	2.15948	2907.19	1.24847	39.1365	0.430911	1903.06	1.47531	310.902	3.5571	1005.16	1.36469	1019	1.56806	57.653	1.01034
	25Jun11A346	UG1-W-340	9.05963	0.0794514	18.9041	0.159927	6.62059	2.26266	5026.61	2.27639	2886.96	0.975691	39.5835	0.358699	1855.98	1.57905	308.401	2.69348	995.242	1.49102	987.898	1.37369	57.8444	1.30493
	25Jun11A347	UG1-W-341	9.1193	0.119031	18.957	0.240955	6.4574	2.01703	4887.71	1.60714	2871.47	1.44486	39.3673	0.533908	1885.67	0.866532	308.64	4.1525	1012.6	0.830007	995.441	1.59174	59.7237	0.938915
	25Jun11A348	UG1-W-342	9.12518	0.100032	19.3104	0.205621	6.41096	2.19096	4758.68	1.36585	2905.03	1.22933	39.3487	0.433305	1911.35	0.999345	309.295	3.19677	990.834	0.805671	998.521	1.23174	57.9594	0.990449
	25Jun11A349	UG1-W-343	9.1735	0.109035	19.0369	0.205972	6.67977	2.04456	4860.48	1.57437	2874.7	1.27	39.288	0.466413	1892.77	0.974412	307.163	3.72743	1001.52	0.877847	982.832	1.2449	59.1859	0.907104
	25Jun11A350	UG1-W-344	9.13915	0.0879354	18.9648	0.169474	6.55993	1.91544	4880.34	1.43216	2900.13	1.01221	39.4848	0.386762	1903.35	1.04028	307.215	2.68797	981.047	0.87418	1006.52	1.40582	58.0739	0.88663
	25Jun11A351	UG1-W-345	9.1527	0.152288	18.4573	0.29004	6.6166	2.19996	4979.83	1.53594	2850.52	1.70757	39.6031	0.730481	1911.14	1.27479	306.333	5.15105	1004.32	1.17798	1037.71	1.40862	58.8897	1.03484
	25Jun11A352	UG1-W-346	9.1491	0.162708	18.755	0.316402	6.46962	1.88763	4951.35	1.67372	2898.06	1.94146	39.862	0.764639	1909.32	1.20072	313.608	5.46538	993.585	1.03523	979.265	1.23258	59.8146	0.95281
	25Jun11A353	UG1-W-347	9.07914	0.148703	18.6604	0.309245	6.60753	2.11588	4940.39	1.74431	2853.22	1.83399	39.7553	0.683289	1890.53	1.25461	306.13	5.50987	1015.16	1.06394	1026.44	1.50192	58.332	0.989066
	25Jun11A354	UG1-W-348	9.03884	0.11824	18.4541	0.26022	6.44526	1.99114	4981.57	1.20206	2865.52	1.50502	40.1507	0.557271	1890.8	0.868799	309.791	5.02994	1014.92	0.828217	1078.1	1.8794	60.4372	0.962986
	25Jun11A355	UG1-W-349	9.17516	0.0937336	19.1176	0.184942	6.46485	2.0064	4827.43	1.75622	2869.48	1.04561	39.4507	0.419442	1945.26	1.13912	311.141	3.6189	951.524	1.12084	1129.21	1.63353	60.0578	1.55578
	25Jun11A356	UG1-W-350	9.19816	0.0866434	19.358	0.186803	6.21863	2.2056	4980	1.72969	2890.01	0.964534	39.0634	0.391557	1906.44	1.4099	308.581	2.9786	1011.1	1.25488	1012.16	1.36547	58.879	1.46656
	25Jun11A357	UG1-W-351	8.96601	0.0808819	18.6198	0.160727	6.5345	2.22575	4881.22	1.94552	2862.58	1.01757	39.8196	0.359222	1883.18	1.46238	306.021	2.77731	1013.8	1.29954	1030.65	0.984593	57.9622	1.4151
	25Jun11A358	UG1-W-352	9.14242	0.078605	19.1573	0.174886	6.18685	2.09998	4811.51	1.62263	2915.89	1.00218	39.111	0.380829	1902.92	1.07342	304.768	2.78249	986.491	0.980487	1013.88	1.05855	56.9264	1.07058
	25Jun11A359	UG1-W-353	9.07485	0.0862486	18.9687	0.19069	6.15511	1.89184	4941.54	1.78115	2882.22	1.08494	39.3916	0.395876	1877.71	1.31068	306.657	2.9848	1009.35	1.14035	1025.53	1.38925	58.5749	0.91622
	25Jun11A360	UG1-W-354	9.22405	0.0878463	19.5018	0.193617	6.19021	1.64033	4934.54	1.49995	2924.55	1.03954	38.804	0.387794	1880.85	1.03606	308.086	2.68865	999.626	0.998644	971.374	1.73325	59.923	0.937884
	25Jun11A361	UG1-W-355	9.04847	0.142465	18.4018	0.267087	6.86537	1.88552	4908.31	1.31284	2859.53	1.72139	40.1079	0.679649	1914.08	0.936999	311.423	4.9472	973.09	0.855312	967.98	1.34684	57.3689	0.951983
	25Jun11A362	UG1-W-356	9.0664	0.1177	18.2805	0.226915	6.71706	1.82131	4865.14	1.52325	2829.38	1.37783	40.1204	0.569798	1914.27	1.23454	309.948	4.30822	955.358	1.01117	979.32	1.31678	59.8582	0.905288
	25Jun11A363	UG1-W-357	9.11271	0.0881275	18.8023	0.158099	6.41649	1.77713	4933.47	1.19656	2860.85	0.993687	39.7081	0.385268	1870.73	0.855695	307.276	2.69349	1015.13	0.871706	1005.91	1.72377	57.915	0.850994
	25Jun11A364	UG1-W-358	9.12239	0.0953393	19.1803	0.195159	6.5447	1.94672	4887.4	1.45491	2896.44	1.15077	39.0517	0.421562	1890.58	1.1716	309.761	3.51773	986.566	0.917415	1013.63	1.3947	62.0942	0.949908
	25Jun11A365	UG1-W-359	9.15818	0.0989493	18.9615	0.196574	6.14203	2.05826	5003.91	1.47934	2895.36	1.25926	39.1117	0.443591	1905.11	1.14087	308.136	3.29603	1013.87	0.991428	1064.01	1.31359	58.576	1.45598
	25Jun11A366	UG1-W-360	9.42278	0.108688	19.5678	0.214055	6.16982	2.1097	4944.32	1.29151	2963.57	1.44275	38.4313	0.499369	1917.55	0.881103	311.06	3.8632	984.19	0.826555	981.375	1.61612	56.5841	1.05727
	25Jun11A367	UG1-W-361	9.04512	0.0788231	19.0236	0.161773	6.19342	2.06637	4787.34	1.68226	2859.53	0.943672	39.2199	0.335888	1925.7	1.28559	309.42	2.70447	984.533	1.19441	982.027	1.36366	57.1376	0.840751
	25Jun11A368	UG1-W-362	9.06568	0.0892639	18.9001	0.186774	6.48312	2.12849	5016.77	1.50753	2846.3	1.10903	39.3341	0.388198	1925.61	1.05563	310.242	3.08813	965.054	1.01293	999.506	1.30482	58.353	0.861577
	25Jun11A369	UG1-W-363	9.13359	0.0906999	19.2237	0.177038	6.4227	2.04788	4738.12	1.43061	2845.81	1.05691	39.1356	0.387195	1877.54	1.06396	309.113	2.99883	988.326	1.063	1038.99	1.29643	58.5842	0.886327
	25Jun11A370	UG1-W-364	9.22551	0.0827168	19.554	0.1711	6.36104	1.87869	4924.88	1.37112	2884.25	1.02817	38.64	0.374183	1893.79	0.967713	308.549	2.80701	993.751	0.82261	977.929	1.82059	60.848	0.984311
	25Jun11A371	UG1-W-365	9.12143	0.0756469	19.2138	0.166252	6.58738	1.94174	4855.15	2.01858	2863.85	0.968283	38.9211	0.363639	1905.31	1.66803	308.841	2.76953	993.281	1.5391	996.805	1.58299	58.1927	0.939783
	25Jun11A372	UG1-W-366	9.13914	0.0973353	18.7101	0.194438	6.39636	2.40839	4902.74	1.96575	2845.44	1.14631	39.5793	0.457385	1895.1	1.62678	310.232	3.35784	987.438	1.84604	1030.44	2.05766	57.0344	0.95554
	25Jun11A373	UG1-W-367	9.04031	0.0908144	18.9575	0.207627	6.47942	1.86568	4846.83	2.27286	2847.01	1.11223	39.3792	0.412065	1937.66	1.65241	311.004	3.30803	989.344	1.53608	1004.02	1.73227	58.8554	1.05195
	25Jun11A374	UG1-W-368	9.1613	0.107581	19.0378	0.224605	6.51691	1.94345	4796.79	1.65118	2865.03	1.31049	39.2016	0.492576	1921.1	1.39618	313.407	3.87191	959.692	1.16249	970.97	1.3769	61.1769	1.00136
	25Jun11A375	UG1-W-369	9.12824	0.114956	18.9995	0.226172	6.17072	2.01611	4836.25	1.33648	2848.37	1.28023	39.3161	0.512988	1872.24	0.967868	309.028	3.93789	999.658	0.798359	1053.51	1.89462	59.2364	0.886679
	25Jun11A376	UG1-W-370	9.22038	0.0744148	19.2994	0.163757	6.15622	2.23327	4833.95	1.17679	2878.96	0.850599	38.713	0.317162	1889.24	0.931791	311.01	2.53972	1022.04	0.904217	980.432	1.54938	57.1777	0.930591
	25Jun11A377	UG1-W-371	9.19392	0.10418	19.0792	0.225777	6.223	2.3064	4897.39	1.17075	2857.25	1.30043	38.9816	0.492043	1932.99	0.867944	309.796	3.87532	976.673	0.801903	983.2	1.23258	56.7499	0.945726
	25Jun11A378	UG1-W-372	9.09626	0.101755	19.0978	0.221599	5.95269	2.3014	4960.23	1.17737	2860.72	1.25532	39.1477	0.495218	1914.2	0.863596	309.368	3.6112	1013.02	0.784138	967.874	1.28104	56.9395	1.02667
	25Jun11A379	UG1-W-373	9.12779	0.120696	19.2203	0.248597	6.20819	1.90668	4874.65	1.28455	2866.95	1.44474	38.9058	0.53938	1893.82	0.9465	308.728	4.33701	991.276	0.795625	975.74	1.22618	57.1914	0.947871
	25Jun11A380	UG1-W-374	8.98404	0.133648	18.4251	0.251454	6.23625	1.88586	4929.93	1.22753	2827.65	1.55201	39.6532	0.620191	1863.17	0.892924	308.502	4.64502	1030.28	0.847224	1028.97	1.09756	58.0738	0.772845
	25Jun11A381	UG1-W-375	9.07322	0.101892	18.882	0.199696	6.25756	2.06486	4847.88	1.9796	2840.25	1.26615	39.4802	0.60636	1922.58	1.54514	311.333	3.91645	978.811	1.48773	1049.09	1.09507	58.1875	0.946367
	25Jun11A382	UG1-W-376	9.13203	0.125661	19.2916	0.268758	6.331	1.97699	4915.29	1.64423	2872.46	1.40789	38.9786	0.647043	1927.51	1.37854	310.311	4.57097	942.02	1.12582	1012.87	1.13388	57.4401	0.950182
	25Jun11A383	UG1-W-377	9.21488	0.10686	19.4669	0.21305	6.43625	2.26345	4822.09	1.22403	2896.12	1.33947	38.82	0.468943	1885.01	0.865447	309.126	3.67123	967.064	0.828212	1046.21	1.05859	59.492	1.30454
	25Jun11A384	UG1-W-378	9.22251	0.0906087	19.7707	0.18991	6.43756	2.13544	4964.55	1.43088	2915.16	1.08957	38.2749	0.449217	1885.3	1.07046	308.971	3.50235	985.249	0.901716	1043.43	1.3375	56.2208	1.19925
	25Jun11A385	UG1-W-379	9.19257	0.118033	19.0875	0.239647	6.11285	2.22037	4833.43	1.46518	2859.8	1.37533	39.0882	0.566925	1924.11	0.99841	312.765	4.40918	989.159	1.00951	1053.56	1.16229	58.0395	1.05939
	25Jun11A386	UG1-W-380	9.15858	0.152252	19.0864	0.301467	6.36864	2.08931	4972.24	1.58222	2829.91	1.68842	39.3766	0.74595	1910.63	1.21189	310.722	5.46497	1039.86	1.11683	1037.32	1.13962	60.1271	1.20212
	25Jun11A387	UG1-W-381	9.18689	0.0931897	19.0088	0.1974	6.39004	2.26807	4900.19	1.24008	2897.52	1.13758	39.3125	0.401841	1913.6	0.817216	306.279	2.90307	985.617	0.772236	1032.56	1.32594	58.2823	0.923576
	25Jun11A388	UG1-W-382	9.11381	0.0895396	18.8763	0.196956	6.50712	1.86683	4823.8	1.23005	2879.84	1.12703	39.3774	0.406762	1907.35	0.969376	305.909	3.05824	966.394	0.890296	1076.69	1.40589	61.1353	1.22863
	25Jun11A389	UG1-W-383	9.18694	0.0945395	19.122	0.20921	6.32916	1.86462	4938.23	1.35293	2905.48	1.16256	39.1208	0.408833	1881.82	0.903438	309.206	3.36993	973.219	0.854582	1074.79	1.50971	60.66	1.32934
	25Jun11A390	UG1-W-384	9.12428	0.125568	18.6839	0.258602	6.00533	2.41612	4996.8	1.23856	2873.56	1.5349	39.5864	0.558994	1889.76	0.89106	306.167	4.18149	1024	0.837147	1072.67	1.69951	58.3274	1.26012
	25Jun11A391	UG1-W-385	9.22534	0.155251	19.0019	0.324676	6.95143	2.08102	4965.63	1.331	2889.96	1.91823	39.2451	0.673591	1910.89	0.81687	308.174	5.30689	997.506	0.74366	1004.58	1.36159	57.9526	1.00264
	25Jun11A392	UG1-W-386	9.1402	0.117946	18.5319	0.246404	6.68935	2.45558	4978.88	1.37569	2890.02	1.46061	39.6567	0.554587	1895.16	1.04115	307.39	4.07723	959.701	0.935605	999.127	1.15754	56.9641	0.908085
	25Jun11A393	UG1-W-387	9.05921	0.0912713	18.4257	0.180538	6.41436	2.08231	4910.25	1.52696	2870.01	1.12355	39.819	0.417951	1920.39	0.979734	307.079	3.20233	949.394	0.894676	1028.76	1.38189	57.4238	0.850566
	25Jun11A394	UG1-W-388	9.16423	0.14691	18.7131	0.276656	6.38088	2.2595	4878.22	1.71051	2918.6	1.7528	39.2611	0.636947	1897.67	1.21668	309.848	5.03942	979.161	1.08167	1049.56	1.39239	55.9158	0.932998
	25Jun11A395	UG1-W-389	9.2073	0.124924	18.7276	0.232115	6.48678	2.72403	4992.24	1.59805	2925.18	1.58033	39.8045	0.590877	1906.89	1.16496	312.058	4.55541	980.646	1.18405	1015.17	1.13567	58.6281	1.41568
	25Jun11A396	UG1-W-390	9.19474	0.0939596	19.2157	0.190643	6.66042	2.41725	4968.62	1.06994	2926.36	1.13002	39.0906	0.407833	1911.12	0.813371	308.618	3.11557	1002.06	0.804328	1005.52	1.6412	56.351	1.10272
	25Jun11A397	UG1-W-391	9.1055	0.108872	18.7806	0.214024	6.58473	2.12788	4917.52	1.63897	2883.04	1.25986	39.6209	0.463898	1893.01	1.19387	308.176	3.46245	987.017	1.14618	1053.61	1.35003	58.5418	1.31257
	25Jun11A398	UG1-W-392	9.25542	0.0890451	19.3823	0.182221	7.06808	2.26662	4977.99	1.63072	2940.85	1.01295	38.999	0.357934	1902.32	1.12145	308.014	2.86917	968.883	0.954449	1084.51	1.4127	58.2817	1.25131
	25Jun11A399	UG1-W-393	9.16337	0.104523	19.0365	0.234145	6.56279	2.2945	4967.77	1.68145	2916.66	1.29925	39.3836	0.446415	1916.06	1.3544	311.003	3.88598	988.781	1.11506	992.524	1.21348	58.544	0.887142
	25Jun11A400	UG1-W-394	9.13729	0.136401	18.6464	0.268244	6.34147	2.14746	4945.43	1.82664	2902.02	1.66061	39.5421	0.578072	1943.95	1.39948	308.635	4.56548	955.324	1.2998	1056.96	1.21235	58.0154	0.999327
	25Jun11A401	UG1-W-395	9.07572	0.118714	18.7343	0.257747	6.67484	2.38874	5033.89	1.53439	2901.09	1.4598	39.6364	0.563604	1886.31	1.09938	309.098	4.23499	968.47	1.06806	1003.69	1.66459	59.3949	0.827263
	25Jun11A402	UG1-W-396	9.19398	0.132105	18.9683	0.27997	6.69398	2.22452	4995.72	1.73265	2922.25	1.63763	39.295	0.603119	1916.5	1.40186	308.695	4.31879	1011.02	1.46393	1021.67	1.30855	57.1121	0.962831
	25Jun11A403	UG1-W-397	9.23917	0.129801	18.9079	0.229341	6.31618	2.26871	5041.41	1.59756	2913.1	1.39612	39.3229	0.561618	1916.47	1.13129	308.727	3.99778	997.282	1.0546	1057.74	1.18835	57.8461	1.0735
	25Jun11A404	UG1-W-398	8.96081	0.110121	18.2421	0.232043	6.4221	2.54556	5028.81	1.61684	2876.83	1.41481	39.9966	0.52881	1891.09	1.04289	306.48	4.06391	1027.41	0.893244	1006.88	1.1123	56.5711	0.998581
	25Jun11A405	UG1-W-399	8.99312	0.0880801	18.5532	0.189947	6.61535	2.15041	5012.83	1.87498	2899.38	1.13378	39.7707	0.417543	1942.54	1.38077	308.438	3.09711	1014.03	1.47359	975.483	0.920941	58.5409	1.09296
	25Jun11A406	UG1-W-400	9.16742	0.140844	18.8261	0.294046	6.72553	2.67638	4922.43	2.08916	2920.08	1.77721	39.202	0.629414	1888.03	1.60512	310.596	4.97293	979.005	1.47525	1050.91	1.17345	58.8188	0.921757
	25Jun11A407	UG1-W-401	9.13067	0.0844817	19.5456	0.18816	6.59523	2.09823	4954.27	1.49372	2892.82	1.06021	38.5539	0.373566	1894.34	1.01889	311.604	2.96739	974.549	0.905982	1011.26	1.23118	55.8652	1.05351
	25Jun11A408	UG1-W-402	9.2847	0.0848793	19.273	0.191495	6.60086	2.3085	4934.82	1.52951	2925.39	1.0795	38.1516	0.367243	1914.63	0.993005	310.736	2.93629	961.524	0.892214	1026.18	1.27918	58.1732	0.988449
	25Jun11A409	UG1-W-403	9.12845	0.09693	19.4752	0.2014	6.63033	2.06909	4958.1	1.53493	2910.4	1.12948	38.563	0.386882	1898.25	1.05127	310.973	3.32839	968.163	0.941506	1014.18	1.07631	59.2921	1.18009
	25Jun11A410	UG1-W-404	9.09123	0.120031	18.9248	0.231747	7.17021	2.36113	4911.11	1.89244	2847.95	1.42165	39.3892	0.529112	1911.15	1.36934	311.577	3.87565	957.021	1.14686	1038.72	1.3038	61.7954	1.00674
	25Jun11A411	UG1-W-405	9.11895	0.103925	19.2202	0.232869	6.59788	1.98671	4896.29	2.12166	2899.36	1.44618	39.1079	0.524874	1907.7	1.65919	309.147	3.86612	970.741	1.51601	1018.51	1.55615	61.8025	1.03926
	25Jun11A412	UG1-W-406	9.06716	0.122024	19.1708	0.27019	6.21087	2.14334	4919.34	1.7369	2880.89	1.58285	39.2002	0.547711	1930.77	1.30584	309.964	4.44139	953.783	1.03757	1003.92	1.27362	61.279	0.885737
	25Jun11A413	UG1-W-407	9.00212	0.0767089	19.0282	0.16788	6.38651	2.08123	4890.59	1.39085	2857.36	0.953094	39.1983	0.335823	1933.64	1.01049	307.758	2.76035	949.813	0.848342	1097.26	1.35695	59.9143	1.26738
	25Jun11A414	UG1-W-408	9.05452	0.0839438	18.957	0.185622	6.51858	2.84293	4993.22	2.61711	2857.55	0.990648	39.2121	0.376779	1902.44	1.51219	310.031	2.95224	970.547	1.39578	1014.14	1.03303	58.6509	0.949449
	25Jun11A415	UG1-W-409	9.14997	0.0840023	19.2954	0.175858	6.53101	2.08468	4990.42	1.86376	2877.17	1.01618	38.7694	0.383765	1898.84	1.40207	308.962	2.87159	984.297	1.43342	1073	1.17774	59.0079	1.22798
	25Jun11A416	UG1-W-410	9.23237	0.091873	19.3786	0.194167	6.53082	2.60343	4964.82	1.35087	2835.65	1.10871	38.913	0.432151	1882.86	0.989771	309.051	3.13523	987.299	0.832164	987.421	1.46484	58.2581	0.827343
	25Jun11A417	UG1-W-411	9.20255	0.101313	19.2966	0.219891	6.3695	2.03402	4978.81	1.50942	2844.15	1.2166	38.6911	0.446929	1898.97	1.11333	311.224	3.47053	965.646	0.995198	1001.32	1.41795	58.9379	0.998928
	25Jun11A418	UG1-W-412	9.12282	0.107177	19.2401	0.236104	6.36986	2.03514	5027.42	1.33823	2845.01	1.32238	38.8467	0.490351	1883.93	0.943877	311.418	3.94714	986.427	0.820602	974.155	1.28472	59.2467	0.806192
	25Jun11A419	UG1-W-413	9.28374	0.10968	19.3996	0.232143	6.22335	1.84806	4921.72	1.496	2860.98	1.25164	38.6275	0.490983	1884.75	1.1274	315.452	3.93132	958.138	0.96292	996.971	1.20159	58.0419	0.891256
	25Jun11A420	UG1-W-414	9.20967	0.12602	19.1633	0.262326	6.17189	1.83357	4906.09	1.87143	2860.43	1.53209	38.7969	0.567489	1912.16	1.48043	312.361	4.64533	968.5	1.31868	999.758	1.2329	59.1194	1.09667
	25Jun11A421	UG1-W-415	9.24131	0.111491	19.1741	0.230837	6.42204	2.19536	4912.98	1.72861	2873.64	1.31361	38.6689	0.480299	1906.78	1.33839	315.396	4.13387	959.92	1.14713	991.132	1.38055	58.7349	1.03337
	25Jun11A422	UG1-W-416	9.30779	0.121853	19.2715	0.268273	6.39862	1.99796	4941.75	2.03401	2887.08	1.54335	38.9574	0.544033	1906.55	1.51237	313.675	4.47427	979.572	1.29234	989.186	1.16489	58.9744	0.944088
	25Jun11A423	UG1-W-417	9.22974	0.119959	19.1539	0.236611	6.23132	1.98126	4964.27	1.77067	2853.25	1.40031	38.8401	0.520078	1892.22	1.30385	309.693	4.04202	984.774	1.25986	1015.84	1.07978	59.0258	1.17671
	25Jun11A424	UG1-W-418	9.30348	0.141034	19.4272	0.273332	6.42849	2.36081	4838.83	1.7329	2840.49	1.6501	38.6721	0.654826	1942.07	1.34497	311.704	5.32438	952.235	1.11064	1003.79	1.21896	58.9721	1.08189
	25Jun11A425	UG1-W-419	9.20851	0.119705	18.7356	0.223147	6.02501	2.04847	4914.45	1.4818	2827.77	1.39935	39.4289	0.558148	1922.64	1.06419	309.658	4.07173	965.203	0.909785	1058.18	1.17053	59.0788	1.31763
	25Jun11A426	UG1-W-420	9.22107	0.0959461	19.1886	0.197402	6.18721	2.21826	4956.44	2.0992	2844.43	1.10796	38.8633	0.438269	1925.83	1.59686	311.859	3.06182	976.287	1.36698	1014.58	0.993629	58.4341	1.05733
	25Jun11A427	UG1-W-421	9.20149	0.0979131	19.0655	0.203359	6.31649	2.05627	4947.71	1.30993	2895.23	1.17759	39.1278	0.413307	1902.99	0.919608	311.199	3.24946	1016.79	0.870779	1088.05	2.31136	58.9367	1.08766
	25Jun11A428	UG1-W-422	9.23719	0.0834424	19.325	0.168723	5.8887	2.10819	4998.3	1.38085	2968.25	1.0564	38.6771	0.350143	1863.58	0.899525	308.872	2.94256	1030.31	0.917918	1039.34	1.38086	58.2818	1.01267
	25Jun11A429	UG1-W-423	9.16539	0.0873785	18.8352	0.165025	6.18366	2.04275	4968.41	1.38922	2880.82	0.994806	39.261	0.367615	1905.68	0.9529	310.23	2.67831	1034.16	0.994532	989.593	1.20592	58.4473	0.823726
	25Jun11A430	UG1-W-424	9.00598	0.111232	18.3781	0.217804	5.9317	1.86026	4908.07	1.86739	2844.84	1.33424	39.7493	0.489352	1923.06	1.27148	309.562	3.33497	1000.35	1.05494	1041.82	2.00328	58.3156	1.1059
	25Jun11A431	UG1-W-425	9.11452	0.0834665	19.0464	0.174237	6.65841	2.23544	4932.5	1.62255	2884.09	0.992886	39.0355	0.374282	1923.38	1.15637	308.448	2.60638	999.899	1.00319	995.374	1.45271	61.0697	0.958212
	25Jun11A432	UG1-W-426	9.16516	0.101632	18.9602	0.190372	6.74407	2.16446	4888.64	1.86923	2899.19	1.19262	39.0532	0.497452	1901.68	1.36622	308.917	3.83387	976.775	1.16224	999.787	1.6202	58.3572	0.934468
	25Jun11A433	UG1-W-427	9.1057	0.109243	18.6133	0.20991	6.35367	2.06198	4942.37	1.46207	2876.01	1.35702	39.5066	0.479712	1925.2	0.816399	308.275	3.66102	977.97	0.68389	1041.12	1.40768	57.0943	1.09449
	25Jun11A434	UG1-W-428	9.03428	0.0993323	18.761	0.211224	6.37397	1.93644	4917.39	1.23664	2873.26	1.22546	39.2797	0.447597	1934.03	0.887705	309.395	3.41618	979.397	0.78731	1007.78	1.28103	59.3591	0.927401
	25Jun11A435	UG1-W-429	8.96189	0.11697	18.6281	0.215382	6.50782	2.07877	4968.98	1.24704	2841.87	1.43088	40.0995	0.576323	1899.39	0.898775	308.569	4.42629	994.751	0.801546	1027.1	1.12721	58.8173	1.05309
	25Jun11A436	UG1-W-430	9.16178	0.10845	18.9431	0.224547	6.36984	2.23143	4795.69	1.45484	2883.17	1.35737	39.2942	0.515686	1885.14	0.933789	308.171	3.80851	990.186	0.986643	1013.94	1.16896	56.6332	1.00432
	25Jun11A437	UG1-W-431	9.24162	0.092773	19.3995	0.184668	6.64214	2.03604	4864.41	1.64966	2915.26	1.1138	38.8107	0.369761	1919.66	1.12789	309.89	2.94528	989.407	0.983221	1007.01	1.10119	58.0509	0.838671
	25Jun11A438	UG1-W-432	9.23702	0.0954937	19.0681	0.203013	6.72758	2.29346	4975.21	1.65184	2882.09	1.23122	39.0539	0.427614	1927.38	1.20805	308.99	3.25238	985.462	0.993587	965.932	1.17648	59.8186	1.02814
	25Jun11A439	UG1-W-433	9.21899	0.101489	18.8142	0.19752	6.64382	2.00833	4941.8	1.62689	2836.22	1.11759	39.4914	0.449225	1901.89	1.16496	308.95	3.44603	1013.81	1.10343	1106.97	1.36418	58.5334	0.774701
	25Jun11A440	UG1-W-434	9.10582	0.0904937	18.9919	0.191505	6.35116	2.20852	4878.82	1.78337	2846.83	1.07934	39.3719	0.476332	1907.17	1.37115	304.699	3.04108	1000.51	1.30928	1004.76	1.48982	57.805	0.924124
	25Jun11A441	UG1-W-435	9.1909	0.0810789	19.0903	0.169569	6.53756	2.05486	5013	1.58443	2889.63	1.02873	39.2019	0.371298	1920.56	1.14824	308.641	2.87878	1010.2	1.05786	1007.52	1.23268	56.1857	0.950448
	25Jun11A442	UG1-W-436	9.11402	0.131777	18.6409	0.274813	6.36162	1.96797	4950.64	1.98537	2851.22	1.54086	39.6306	0.619507	1906.6	1.43331	306.62	4.64271	995.611	1.24872	1003.43	1.44473	58.4032	0.919082
	25Jun11A443	UG1-W-437	9.12825	0.100376	18.8502	0.190264	6.49507	2.027	4897.52	1.74539	2885.7	1.13789	39.3768	0.436924	1927.43	1.31839	307.322	3.14151	1004.61	1.18979	1012.04	1.6478	58.1434	1.02889
	25Jun11A444	UG1-W-438	9.07907	0.102897	18.8542	0.206676	6.6131	2.04839	4889.6	1.99249	2884.7	1.23404	39.4643	0.529003	1885.05	1.66598	308.446	3.15565	1007.73	1.41433	1011.86	1.57465	57.8281	1.2159
	25Jun11A445	UG1-W-439	9.0809	0.0980338	18.7125	0.178033	6.33637	2.04563	4914.96	1.77301	2879.35	1.16514	39.6249	0.400978	1937.43	1.35247	310.958	3.18085	981.987	1.18334	1073.83	1.40808	57.3816	0.759423
	25Jun11A446	UG1-W-440	9.04604	0.122585	18.5638	0.230226	6.89747	2.60066	4893.64	1.4403	2873.47	1.44015	40.0191	0.61612	1902.07	1.03942	307.459	4.52296	999.527	0.958264	983.712	1.08448	58.1146	0.99671
	25Jun11A447	UG1-W-441	9.17723	0.0842091	19.5602	0.17507	6.49629	2.14881	4984.19	1.43228	2935.68	1.01824	38.7088	0.363336	1893.64	1.01351	307.533	2.72272	987.277	0.906497	995.423	1.47585	55.731	0.877481
	25Jun11A448	UG1-W-442	8.94205	0.0840592	18.3631	0.180443	6.62971	1.84788	5072.4	1.31934	2865.31	1.06842	40.0666	0.389171	1899.65	0.932069	310.676	3.06132	1031.63	0.836849	971.745	1.35675	57.6572	1.02302
	25Jun11A449	UG1-W-443	9.08854	0.0913974	19.0479	0.177143	6.57874	2.03172	4909.27	1.18929	2926.96	1.14201	39.3192	0.42571	1895.19	0.872808	308.095	3.17774	983.239	0.825395	1042.57	1.16688	61.4606	1.08018
	25Jun11A450	UG1-W-444	9.18076	0.13608	18.9492	0.253653	6.53787	2.13678	4865.26	1.60603	2926.56	1.516	39.3323	0.574911	1930.82	1.17956	307.302	4.14931	969.829	0.887392	1053.14	1.81402	56.2456	0.845741
	25Jun11A451	UG1-W-445	9.12804	0.102789	19.1616	0.197501	7.0306	2.20678	4922.97	1.28577	2879.79	1.17238	39.0896	0.493256	1922.18	0.933771	309.349	3.49816	996.351	0.778322	1011.95	1.35553	59.5105	0.916649
	25Jun11A452	UG1-W-446	9.19255	0.109111	18.9101	0.213721	6.82815	2.38032	4931.61	1.5932	2910.35	1.2692	39.2576	0.465322	1913.86	1.15606	312.113	4.04001	1010.22	1.0912	987.902	1.22816	59.9456	1.21489
	25Jun11A453	UG1-W-447	9.34346	0.107766	19.8064	0.236176	6.673	2.09772	4938.24	1.57652	2965.87	1.40019	38.2416	0.465779	1935.73	1.28107	306.451	3.44028	977.676	1.09363	1086.17	1.30211	59.7615	1.32979
	25Jun11A454	UG1-W-448	9.02968	0.144476	18.4517	0.287757	6.44902	2.48961	4921.39	1.54717	2865.04	1.76087	39.8382	0.632182	1928.51	1.17564	310.1	4.98371	981.209	0.939905	1045.97	1.75431	57.2603	0.955328
	25Jun11A455	UG1-W-449	9.03291	0.128551	18.3692	0.246858	6.15513	2.32221	4870.16	1.59505	2882.67	1.48986	39.8561	0.555802	1948.51	1.29259	310.473	4.13822	940.562	1.09259	1010.83	1.15195	57.3279	1.26868
	25Jun11A456	UG1-W-450	9.10717	0.139266	18.6612	0.273947	6.49391	1.89982	4935.85	1.82034	2904.45	1.67149	39.7888	0.635683	1900.91	1.26643	311.114	4.87806	986.118	1.04617	1052.16	1.01529	55.5768	1.13481
	25Jun11A457	UG1-W-451	9.01337	0.104126	18.4476	0.218152	6.10828	2.29245	4996.22	1.50982	2883.91	1.23689	39.7559	0.459846	1884.68	0.961614	304.192	3.34219	1007.64	0.80892	1061.26	1.11443	59.4376	1.41001
	25Jun11A458	UG1-W-452	9.03007	0.118342	18.3333	0.235883	6.47761	2.4742	4914.74	1.45761	2914.04	1.52475	40.1064	0.548937	1900.99	1.05123	307.866	4.289	988.43	0.950337	1001.37	1.13719	55.5581	0.804205
	25Jun11A459	UG1-W-453	9.29998	0.123519	19.3881	0.252545	6.77512	2.51772	4816.61	1.58423	2916.11	1.43713	38.8088	0.503452	1896.67	1.03513	309.961	4.03694	962.169	1.03976	1012.67	1.3394	56.5187	0.942502
	25Jun11A460	UG1-W-454	9.12753	0.103276	19.1754	0.221875	6.43257	2.69422	4883.9	1.56358	2935.33	1.37312	39.0645	0.461926	1892.17	1.0741	306.704	3.7019	976.072	0.960538	967.659	1.26535	59.7755	1.01279
	25Jun11A461	UG1-W-455	9.17465	0.117558	18.8913	0.235425	6.79533	2.1031	4944.86	1.45027	2899.54	1.39374	39.2751	0.504422	1889.94	0.860062	309.071	3.79063	997.558	0.877459	1013.17	0.864251	59.8381	0.880576
	25Jun11A462	UG1-W-456	9.06979	0.0817248	18.5353	0.172432	6.61862	2.24727	4908.96	2.09878	2898.1	0.93108	39.4754	0.338636	1930.26	1.39119	306.495	2.58052	959.878	1.20792	1013.85	1.07641	60.035	1.26928
	25Jun11A463	UG1-W-457	9.13956	0.101688	18.9884	0.202422	6.29765	1.92859	4994.88	1.57864	2908.18	1.13305	39.4514	0.44305	1912.1	0.999641	310.194	3.48659	976.084	0.821484	1055.87	1.15781	56.6822	0.737069
	25Jun11A464	UG1-W-458	9.18369	0.154881	19.0236	0.305496	6.76118	1.88001	4916.74	1.55084	2917.18	1.89436	39.3792	0.775626	1886.55	1.00349	308.065	5.21345	982.528	1.093	1039.78	1.29588	57.8127	0.983201
	25Jun11A465	UG1-W-459	9.01193	0.157695	18.6895	0.320341	6.5851	2.22158	4941.55	1.45351	2877.87	1.92316	39.7881	0.747752	1929.85	1.02127	308.264	5.63903	959.69	0.825444	973.895	1.36537	59.4311	1.48923
	25Jun11A466	UG1-W-460	9.05549	0.0956725	18.9237	0.194135	7.01932	2.00369	4899.81	1.8816	2888.63	1.16138	39.4666	0.46452	1897.51	1.21681	309.557	3.36562	984.593	1.23039	997.231	1.29508	57.1316	1.4691
	25Jun11A467	UG1-W-461	9.06394	0.0803067	18.984	0.176007	6.75035	2.18177	5051.96	1.44637	2848.62	1.02097	39.6652	0.358456	1884.95	0.842676	304.435	2.7121	1012.07	0.804848	1058.94	1.62789	58.4219	1.02187
	25Jun11A468	UG1-W-462	9.17136	0.0899909	19.0228	0.181431	6.38919	2.24858	4876.85	1.34881	2858.6	1.05388	39.5566	0.393891	1913.62	0.958201	305.588	3.00635	944.643	0.802897	999.705	1.31988	57.2355	0.999567
	25Jun11A469	UG1-W-463	9.2092	0.0866953	19.3873	0.190735	6.35542	2.4887	4962.64	1.53869	2883.93	1.09402	39.2286	0.401935	1904.23	0.965746	304.773	2.97309	978.631	0.832094	1008.92	1.20526	58.3522	0.986215
	25Jun11A470	UG1-W-464	9.1961	0.0965923	18.8864	0.191835	6.42491	2.26183	4947.41	1.70043	2872.55	1.07822	39.6535	0.413521	1905.85	1.31501	305.844	3.03102	973.196	1.14707	1008.8	1.71295	58.5688	0.945291
	25Jun11A471	UG1-W-465	9.18656	0.0877971	19.4713	0.18978	6.49564	2.44827	4908.07	1.43451	2898.6	1.07463	39.135	0.380273	1894.31	1.05692	305.097	2.82593	1009.06	0.938211	1038.95	1.68284	56.4998	0.808201
	25Jun11A472	UG1-W-466	9.10017	0.130113	18.7343	0.258605	6.50032	2.16289	5011.66	1.61695	2844.56	1.54455	39.9546	0.635274	1911.26	1.05049	305.721	5.09589	961.413	0.880439	1015.72	1.23927	60.084	1.01597
	25Jun11A473	UG1-W-467	9.16648	0.115894	19.1441	0.245561	6.37943	2.29874	5052.77	1.68964	2911.12	1.46005	39.5303	0.545436	1858.69	1.10575	305.952	4.42903	1028.63	1.10407	995.339	1.04853	57.1848	1.16757
	25Jun11A474	UG1-W-468	9.19431	0.109911	18.9889	0.214627	6.36273	2.29	4862.27	1.97376	2863.96	1.25017	39.7391	0.457813	1932.09	1.57162	305.449	3.75628	965.947	1.33942	1041.29	1.2224	59.8982	1.09796
	25Jun11A475	UG1-W-469	9.0028	0.0938507	18.6825	0.185759	6.42908	2.28753	4909.03	1.88188	2849.32	1.15359	39.9815	0.456035	1924.41	1.32861	309.863	3.24541	947.235	1.07693	1038.63	1.26581	56.9083	0.922158
	25Jun11A476	UG1-W-470	9.01014	0.101807	18.5668	0.199134	6.26894	2.28313	4935.17	2.06151	2812.13	1.22203	40.3929	0.480856	1885.13	1.43272	309.926	3.48801	970.607	1.31602	1047.56	1.35206	57.726	0.991608
	25Jun11A477	UG1-W-471	9.12101	0.108262	18.9666	0.22515	6.55104	2.31089	4925.7	1.53548	2857.83	1.2493	39.7486	0.520576	1935.27	1.14615	310.244	3.55499	960.229	1.03947	1001.41	1.31493	56.7388	0.902541
	25Jun11A478	UG1-W-472	9.10032	0.0901411	18.7574	0.177006	5.92712	2.21337	4877.51	1.8004	2869.53	1.0383	39.8319	0.422332	1932.13	1.25009	309.713	3.37039	938.851	1.1247	1036.68	1.51179	58.0477	0.983547
	25Jun11A479	UG1-W-473	9.19644	0.0844432	19.1851	0.182292	6.54015	2.39488	5038.69	1.85065	2920.19	0.977678	39.336	0.383434	1884.44	1.27652	309.531	2.70956	1001.99	1.14121	992.79	1.43701	58.3164	0.868813
	25Jun11A480	UG1-W-474	9.26893	0.133915	19.2243	0.252288	6.20652	2.34137	5121.12	1.69248	2905.87	1.62601	39.4674	0.594612	1884.76	1.15748	308.477	4.81477	991.801	1.10046	986.266	1.11728	59.0776	1.33754
	25Jun11A481	UG1-W-475	9.19266	0.0833995	19.1246	0.162553	6.43906	2.41459	4974.54	1.77129	2888.75	0.947047	39.5846	0.388496	1889.19	1.29042	304.336	3.13144	982.805	1.16659	977.602	1.25134	57.9538	0.908596
	25Jun11A482	UG1-W-476	9.20041	0.100152	19.1127	0.215957	6.69437	2.28911	5002.12	1.20328	2878.55	1.17876	39.4941	0.443528	1947.98	0.836277	304.504	3.48754	963.672	0.698245	984.95	1.77172	57.6725	0.985927
	25Jun11A483	UG1-W-477	9.03081	0.0948238	18.6603	0.193748	6.54924	2.08749	5016.33	1.5723	2858.88	1.07432	40.4181	0.500154	1887.39	1.00606	306.291	3.28436	978.565	0.981016	973.22	1.17627	57.2536	1.02108
	25Jun11A484	UG1-W-478	9.16799	0.10498	18.9104	0.197985	6.16662	2.28624	4881.95	2.15209	2911.1	1.25459	39.4906	0.499491	1906.44	1.71403	304.284	3.60453	982.708	1.50524	980.664	1.11936	58.5549	0.999791
	25Jun11A485	UG1-W-479	9.16085	0.104523	18.5923	0.22137	6.24315	2.39675	4906.79	2.34631	2881.78	1.26088	40.0816	0.473695	1927.9	1.73859	305.79	3.55916	963.463	1.58226	998.292	1.34236	57.8571	0.945379
	25Jun11A486	UG1-W-480	9.08669	0.115089	18.9431	0.234429	6.16405	2.27004	4923.91	1.47156	2917.03	1.34812	39.5403	0.490261	1916.91	1.01335	305.359	3.71134	992.844	1.10859	1042.61	1.25676	58.7589	1.06873

## Sheet: QC
Fe-internal calibration	SKCMRE		Mg	Al	Sc	Ti	V	Cr	Mn	Fe	Co	Ni	Cu	Zn	Ga
QC			ug g-1	ug g-1	ug g-1	ug g-1	ug g-1	ug g-1	ug g-1	ug g-1	ug g-1	ug g-1	ug g-1	ug g-1	ug g-1
	QC-GOR128-G		147527	50099.4	31.2977	1661.02	174.183	2265.63	1310.59	76254.5	87.7565	1076	64.8127	73.9442	8.4244
	QC-GOR128-G		149307	49805.6	31.1415	1657.88	178.732	2268.35	1325.63	76254.5	88.8438	1098.19	69.1821	88.7823	8.46204
	QC-GOR128-G		151098	50424.6	31.141	1713.51	177.445	2270.3	1307.94	76254.5	90.9542	1126.78	67.0225	74.0257	8.56403
	QC-GOR128-G		155577	51195.5	31.7102	1670.25	179.591	2301.29	1329.09	76254.5	90.0732	1128.67	64.3682	74.0808	8.35839
	QC-GOR128-G		153804	51257.3	31.5883	1676.09	178.654	2254.05	1311.17	76254.5	90.7179	1139.64	66.0971	71.0223	8.61414
	QC-GOR128-G		155223	51163.6	31.4058	1699.52	179.17	2263.26	1318.42	76254.5	90.338	1131.91	66.6732	74.742	8.61626
	QC-GOR128-G		154344	50764.5	31.5028	1664.68	177.497	2204.61	1319.9	76254.5	90.0424	1153.05	66.1473	72.1235	8.58145
	QC-GOR128-G		146349	49634.6	30.4856	1626.91	174.269	2263.07	1315.72	76254.5	87.8951	1049.1	67.9077	72.9023	8.49824
	QC-GOR128-G		144175	48857.2	30.4683	1597.45	171.571	2208	1320.02	76254.5	86.4005	1026.98	66.6137	70.5634	8.30698
	QC-GOR128-G		149359	50652.2	31.2749	1667.43	177.362	2246.54	1315.24	76254.5	89.4899	1078.24	67.4937	75.0967	8.25123
	QC-GOR128-G		142794	49186.2	30.2413	1606.72	171.786	2196.79	1295.45	76254.5	85.6496	1020.37	66.941	74.7224	8.37136
	QC-GOR128-G		151985	50547.6	31.3339	1662.76	174.38	2242.64	1328.23	76254.5	90.111	1116.97	67.2051	74.6204	8.79215
	QC-GOR128-G		154455	50528.1	31.4072	1673.35	179.809	2284.73	1325.51	76254.5	91.5044	1145.51	64.9782	76.3125	8.72715
	QC-GOR128-G		151030	50209.6	31.0319	1660.78	174.015	2291.75	1310.04	76254.5	89.2357	1103.18	66.1917	73.6947	8.55326
	QC-GOR128-G		148636	50238.6	31.0418	1665.37	178.248	2298.61	1325.31	76254.5	87.5334	1062.34	67.7226	79.6361	8.29551
	QC-GOR128-G		144015	49610.6	32.6191	1634.15	177.124	2198.64	1319.9	76254.5	89.4522	1088.81	67.1729	74.7635	8.54815
	QC-GOR128-G		143350	50201	32.5873	1668.54	178.507	2197.22	1342.58	76254.5	87.5148	1048.67	72.8156	73.2408	8.48601
	QC-GOR128-G		152909	50912.4	32.9176	1679.52	182.169	2267.06	1323.62	76254.5	91.7223	1182.8	59.6572	82.0546	8.60849
	QC-GOR128-G		148853	50664.4	32.4629	1676.55	179.827	2272.15	1331.67	76254.5	90.6366	1121.62	70.9268	73.6258	8.99462
	QC-GOR128-G		145889	50262	32.1425	1678.55	178.654	2244.48	1333.75	76254.5	89.3103	1089.69	74.8572	74.1631	8.76049
	QC-GOR128-G		146185	49302.6	31.3627	1655.57	175.456	2193.06	1303.77	76254.5	91.4975	1131.52	69.0458	68.9176	9.01642
	QC-GOR128-G		147937	49444.3	31.1544	1645.65	177.67	2210.98	1341.87	76254.5	89.9477	1092.84	66.8496	71.3459	8.44154
	QC-GOR128-G		154763	50506.5	32.0151	1689.82	180.785	2252.93	1336.18	76254.5	93.2339	1190.74	69.2381	72.8436	8.8803
	QC-GOR128-G		142345	49343.3	31.1757	1661.59	174.911	2172.68	1332.13	76254.5	85.5594	1032.36	78.7849	75.6641	8.59281
	QC-GOR128-G		148667	50070.3	31.065	1711.93	179.399	2199.92	1332.37	76254.5	89.1198	1099.18	68.991	71.9865	8.85093
	QC-GOR128-G		156867	51288.3	32.2009	1687.61	184.341	2263.85	1343.78	76254.5	92.6829	1192.91	67.137	72.6833	8.88774
	QC-GOR128-G		149060	50258.3	30.972	1637.36	178.564	2184.75	1310.2	76254.5	89.9584	1115.33	68.2389	74.934	8.90594
	QC-GOR128-G		139012	49315.5	30.3108	1630.22	176.029	2113.03	1329.01	76254.5	84.3343	962.172	66.303	71.6131	8.57596
	QC-GOR128-G		149737	50393.4	31.3887	1671.27	179.673	2199.79	1321.05	76254.5	90.4345	1120.48	68.3601	81.5682	8.95778
	QC-GOR128-G		149956	49864.7	30.6377	1678.82	177.569	2172.19	1321.56	76254.5	90.4742	1134.14	67.9195	73.2068	8.94982
	QC-GOR128-G		150541	50333.7	31.0651	1668.92	178.568	2179.11	1331.6	76254.5	89.2196	1084.63	66.1964	75.9495	8.67024
	QC-GOR128-G		148864	50227.9	30.9503	1696.31	181.406	2210.87	1332.39	76254.5	88.808	1089.16	65.6484	70.8964	8.5724
	QC-GOR128-G		149016	50101.3	30.6878	1678.33	177.477	2195.83	1313.73	76254.5	90.7512	1113.21	69.5234	76.7881	8.8647
	QC-GOR128-G		152168	51553.7	31.5974	1692.55	179.68	2226.87	1321.85	76254.5	89.4268	1117.34	67.5766	74.5733	8.91967
			Mg	Al	Sc	Ti	V	Cr	Mn	Fe	Co	Ni	Cu	Zn	Ga
	SKCMRE		ug g-1	ug g-1	ug g-1	ug g-1	ug g-1	ug g-1	ug g-1	ug g-1	ug g-1	ug g-1	ug g-1	ug g-1	ug g-1
	QC-Cr		80389.5	54984	4.64399	448.836	905.662	373087	1376.33	119598	262.98	435.798	6.88027	431.832	14.5336
	QC-Cr		79905.6	54566.7	4.57101	435.366	897.002	367659	1376.68	119598	263.848	443.708	7.03788	436.756	14.8148
	QC-Cr		79822.9	54525.7	4.5167	450.198	903.246	366579	1367.61	119598	264.175	443.069	63.6844	427.2	14.5646
	QC-Cr		79897.1	54546.6	4.61039	442.891	904.167	370451	1382.11	119598	266.384	447.456	6.80237	439.739	14.8762
	QC-Cr		79503.8	54584	4.55765	445.094	902.735	366235	1473.56	119598	264.682	447.329	6.96341	440.221	15.3822
	QC-Cr		79526.6	54557.5	4.44926	441.477	899.174	365881	1374.75	119598	263.602	447.37	6.6809	450.221	15.1938
	QC-Cr		79125.8	53942.3	4.4238	438.257	888.648	357944	1366.45	119598	265.414	452.375	6.81753	454.927	15.0945
	QC-Cr		79037	53521	4.496	427.208	893.4	375413	1368.12	119598	264.07	446.146	6.7317	445.827	14.815
	QC-Cr		78693.2	53732	4.67303	434.739	888.781	368045	1365.4	119598	262.044	444.267	8.26393	431.563	14.8707
	QC-Cr		79794	54949.8	4.4445	446.09	899.609	369195	1368.17	119598	267.296	446.774	6.85198	440.467	14.6246
	QC-Cr		79603.2	54360.7	4.43906	435.519	893.666	371590	1391.35	119598	267.427	447.302	7.23465	445.571	14.7841
	QC-Cr		79939.3	54362	4.26167	442.237	881.518	365155	1378.93	119598	265.813	444.756	8.96172	438.186	14.9166
	QC-Cr		80040.6	54662	4.4638	446.112	905.047	375056	1407.36	119598	269.814	453.136	7.12346	454.332	14.9719
	QC-Cr		79748.4	54158.3	4.46562	439.63	883.254	379763	1376.84	119598	264.885	449.309	6.85098	451.093	14.7814
	QC-Cr		79406.5	53831.4	4.534	445.477	901.842	382765	1375.94	119598	265.657	447.892	10.8186	443.328	14.8189
	QC-Cr		79924.3	55004.9	4.69546	451.393	926.149	367831	1376.65	119598	264.13	444.011	6.96762	460.508	15.0148
	QC-Cr		80365.8	55259.3	4.7173	442.827	927.279	366256	1415.85	119598	265.225	447.854	6.62127	452.822	14.8636
	QC-Cr		79982.9	54877.5	4.59411	447.244	934.851	367861	1388.78	119598	264.606	447.328	6.49823	445.702	14.746
	QC-Cr		81310.2	55520.3	4.63126	446.666	928.294	371546	1401.14	119598	265.868	453.345	6.91172	455.082	14.8173
	QC-Cr		80278.4	55261.2	4.56966	448.021	926.364	369690	1373.17	119598	265.621	451.014	6.24724	461.645	14.9822
	QC-Cr		79798.4	55169.7	4.46027	461.973	922.05	370838	1383.25	119598	266.29	447.263	6.22717	459.529	14.911
	QC-Cr		79736.4	54834.1	4.43266	451.143	917.695	369892	1384.2	119598	267.896	451.034	6.51782	460.268	14.6623
	QC-Cr		79713.5	54587.1	4.54386	460.126	921.914	366018	1476.98	119598	269.28	444.23	8.96186	461.358	15.0355
	QC-Cr		79315.1	54156.9	4.53911	457.592	922.767	367311	1389.7	119598	265.034	450.468	8.28236	461.545	14.7013
	QC-Cr		79523.1	54311.3	4.57897	448.753	923.293	373141	1376.88	119598	267.472	452.518	8.18128	435.597	14.9948
	QC-Cr		79658.3	54275.9	4.80679	444.228	922.353	372631	1391.79	119598	263.252	455.033	7.87799	440.606	14.5869
	QC-Cr		79438.1	54872.9	4.70912	450.68	926.234	367614	1416.65	119598	264.807	446.808	7.27858	447.693	14.7634
	QC-Cr		80484.1	55303	4.52764	449.857	921.826	369698	1385.07	119598	267.234	443.856	6.6682	453.415	14.8667
	QC-Cr		79395.7	54209.6	4.49778	443.007	918.642	368016	1380.21	119598	265.238	441.993	7.64498	457.655	14.7398
	QC-Cr		80429.4	54430.3	4.4724	451.873	919.621	365843	1385.98	119598	266.937	452.258	8.55661	473.951	15.094
	QC-Cr		79407.9	54087.3	4.97814	451.669	921.647	365307	1384.15	119598	267.193	457.814	20.1867	507.494	15.5776
	QC-Cr		79074.3	55153.4	4.56157	458.33	924.875	370570	1382.11	119598	268.068	438.88	8.50669	444.123	14.758
	QC-Cr		79945.5	55529.6	4.43123	468.713	921.172	369417	1378.92	119598	266.816	436.405	7.60554	442.491	14.8307
	QC-Cr		81167.6	56730.1	5.73163	460.139	924.581	370787	1387.51	119598	265.921	433.476	15.8685	432.114	14.7416
